# Supplementary material
Source: PubMed Central journal article supplement (PMC4679729)
Supplement: NIHMS685787-supplement-1.pdf [file NIHMS685787-supplement-1.pdf]

**Supplementary Table 1: Phospho-proteomic data**

| Protein | Protein Names                                                                                                                                                                                                                                       | Gene Names                                                | PEP      | Score  | Modified Sequence                   | Position in peptide | Charge | m/z       | Mass Error [ppm] |
|---------|-----------------------------------------------------------------------------------------------------------------------------------------------------------------------------------------------------------------------------------------------------|-----------------------------------------------------------|----------|--------|-------------------------------------|---------------------|--------|-----------|------------------|
| P07355  | Annexin A2;Annexin II;Annexin-2;Calpactin I heavy chain;Calpactin-1 heavy chain;Chromobindin-8;Lipocortin II;p36;Placental anticoagulant protein IV;Protein I;Annexin A2 pseudogene 2;Lipocortin II pseudogene;Putative annexin A2-like protein     | ANX2;ANX2L4;ANXA2;CAL1H;LPC2D;ANX2L2;ANX2P2;ANXA2P2;LPC2B | 8.66E-72 | 232.53 | _AY(ph)TNFDAERDAINIETAIK_           | 2                   | 3      | 745.68249 | 0.11007          |
| P18433  | Receptor-type tyrosine-protein phosphatase alpha                                                                                                                                                                                                    | PTPA;PTPRA;PTPRL2                                         | 2.09E-70 | 252.08 | _VVQEQYIDAFSDY(ph)ANFK_             | 12                  | 3      | 663.62743 | -0.060737        |
| Q07912  | Activated CDC42 kinase 1;Tyrosine kinase non-receptor protein 2                                                                                                                                                                                     | ACK1;TNK2                                                 | 2.30E-60 | 218.63 | _KPTY(ph)DPVSEDQDPISDFKR_           | 4                   | 3      | 802.02833 | 0.23233          |
| O76039  | Cyclin-dependent kinase-like 5;Serine/threonine-protein kinase 9                                                                                                                                                                                    | CDKL5;STK9                                                | 3.61E-43 | 201.24 | _NISEGNNANYTEY(ph)VATR_             | 13                  | 2      | 998.42583 | -0.20401         |
| P49840  | Glycogen synthase kinase-3 alpha;Glycogen synthase kinase-3 beta                                                                                                                                                                                    | GSK3A;GSK3B                                               | 5.99E-43 | 234.39 | _GEPNVSY(ph)ICSR_                   | 7                   | 2      | 681.28141 | 0.26332          |
| Q9NWX8  | Csk-binding protein;Phosphoprotein associated with glycosphingolipid-enriched microdomains 1;Transmembrane adapter protein PAG;Transmembrane phosphoprotein Cbp                                                                                     | CBP;PAG;PAG1                                              | 3.32E-35 | 180.66 | _SREEDPTITEEISAMY(ph)SSVKNKPGQIVNK_ | 17                  | 4      | 833.64045 | -0.48144         |
| Q9H792  | Sugen kinase 269;Tyrosine-protein kinase Sgk269                                                                                                                                                                                                     | KIAA2002;SGK269                                           | 7.55E-35 | 187.16 | _VPIVINPNAY(ph)DNIAIY(ph)K_         | 16                  | 2      | 1038.994  | 0.3645           |
| Q9H792  | Sugen kinase 269;Tyrosine-protein kinase Sgk269                                                                                                                                                                                                     | KIAA2002;SGK269                                           | 7.55E-35 | 187.16 | _VPIVINPNAY(ph)DNIAIY(ph)K_         | 10                  | 2      | 1038.994  | 0.3645           |
| O14828  | Secretory carrier-associated membrane protein 3                                                                                                                                                                                                     | C1orf3;PROPIN1;SCAMP3                                     | 1.29E-34 | 196.5  | _QY(ph)ATIDVYNPFETR_                | 2                   | 2      | 898.89819 | 0.11908          |
| P08670  | Vimentin                                                                                                                                                                                                                                            | VIM                                                       | 1.96E-34 | 192.39 | _SIY(ph)ASSPGGVYATR_                | 3                   | 2      | 754.84269 | -0.43804         |
| P28482  | ERT1;Extracellular signal-regulated kinase 2;MAP kinase isoform p42;Mitogen-activated protein kinase 1;Mitogen-activated protein kinase 2                                                                                                           | ERK2;MAPK1;PRKM1;PRKM2                                    | 2.18E-34 | 180.11 | _VADPDHHTGFIT(ph)EY(ph)VATR_        | 15                  | 3      | 768.65051 | 0.24611          |
| Q9NWX8  | Csk-binding protein;Phosphoprotein associated with glycosphingolipid-enriched microdomains 1;Transmembrane adapter protein PAG;Transmembrane phosphoprotein Cbp                                                                                     | CBP;PAG;PAG1                                              | 3.78E-34 | 185.02 | _SGQSITVPESTY(ph)TSIQGDPQR_         | 12                  | 3      | 777.68819 | 0.12371          |
| P21860  | Proto-oncogene-like protein c-ErbB-3;Receptor tyrosine-protein kinase erbB-3;Tyrosine kinase-type cell surface receptor HER3                                                                                                                        | ERBB3;HER3                                                | 1.59E-27 | 168.99 | _DGGGPGGYYAAMGACPASEQGY(ph)EEMR_    | 22                  | 3      | 905.00487 | 0.12377          |
| P27361  | ERT2;Extracellular signal-regulated kinase 1;Insulin-stimulated MAP2 kinase;MAP kinase isoform p44;Microtubule-associated protein 2 kinase;Mitogen-activated protein kinase 1;Mitogen-activated protein kinase 3;p44-ERK1                           | ERK1;MAPK3;PRKM3                                          | 8.43E-27 | 173.28 | _IADPEHHTGFIT(ph)EY(ph)VATR_        | 15                  | 3      | 777.99428 | -0.029961        |
| Q96GP6  | Scavenger receptor class F member 2;Scavenger receptor expressed by endothelial cells 2 protein;SRECRP-1                                                                                                                                            | SCARF2;SREC2;SREPCR                                       | 7.94E-26 | 177.81 | _SASSVEGPGGAIY(ph)AR_               | 13                  | 2      | 751.33777 | 0.32538          |
| P49023  | Paxillin                                                                                                                                                                                                                                            | PXN                                                       | 1.40E-24 | 181.66 | _VGEEEHVY(ph)SFPNKQK_               | 8                   | 3      | 624.28389 | 0.226            |
| Q13627  | Dual specificity tyrosine-phosphorylation-regulated kinase 1A;Dual specificity YAK1-related kinase;HP86;Protein kinase minibrain homolog;Dual specificity tyrosine-phosphorylation-regulated kinase 1B;Minibrain-related kinase;Mirk protein kinase | DYRK;DYRK1A;MNB;MNBH;DYRK1B;MIRK                          | 4.32E-24 | 214.32 | _IYQY(ph)IQSR_                      | 4                   | 2      | 575.76826 | -0.25993         |
| Q9NWX8  | Csk-binding protein;Phosphoprotein associated with glycosphingolipid-enriched microdomains 1;Transmembrane adapter protein PAG;Transmembrane phosphoprotein Cbp                                                                                     | CBP;PAG;PAG1                                              | 7.22E-24 | 166.62 | _ENDY(ph)ESISDIQQR_                 | 4                   | 2      | 867.35435 | -0.048725        |

|        |                                                                                                                                                                                                                                                                                                   |                                                             |          |        |                                        |    |   |           |           |
|--------|---------------------------------------------------------------------------------------------------------------------------------------------------------------------------------------------------------------------------------------------------------------------------------------------------|-------------------------------------------------------------|----------|--------|----------------------------------------|----|---|-----------|-----------|
| P07355 | Annexin A2;Annexin II;Annexin-2;Calpactin I heavy chain;Calpactin-1 heavy chain;Chromobindin-8;Lipocortin II;p36;Placental anticoagulant protein IV;Protein I;Annexin A2 pseudogene 2;Lipocortin II pseudogene;Putative annexin A2-like protein                                                   | ANX2;ANX2L4;ANXA2;CAL1H;LPC2D;ANX2L2;ANX2P2;ANXA2P2;LPC2B   | 2.06E-21 | 160.78 | _ISIEGDHSTPPSAY(ph)GSVK_               | 14 | 2 | 962.93805 | 0.36858   |
| Q96PD2 | CUB, LCCL and coagulation factor V/VIII-homology domains protein 1;Discoidin, CUB and LCCL domain-containing protein 2;Endothelial and smooth muscle cell-derived neuropilin-like protein                                                                                                         | CLCP1;DCBLD2;ESDN                                           | 2.06E-21 | 158.78 | _AGKPGIPAPDEIVY(ph)QVPQSTQEVSGAGR_     | 14 | 3 | 977.81312 | -0.14382  |
| Q9NWX8 | Csk-binding protein;Phosphoprotein associated with glycosphingolipid-enriched microdomains 1;Transmembrane adapter protein PAG;Transmembrane phosphoprotein Cbp                                                                                                                                   | CBP;PAG;PAG1                                                | 2.79E-21 | 159.13 | _SVDGDQGGIMEGYPY(ph)EVIK_              | 14 | 2 | 987.43174 | 0.099347  |
| Q9NZM3 | Intersectin-2;SH3 domain-containing protein 1B;SH3P18;SH3P18-like WASP-associated protein                                                                                                                                                                                                         | ITSN2;KIAA1256;SH3D1B;SWAP                                  | 4.43E-21 | 177.42 | _REEPEAIY(ph)AAVVK_                    | 8  | 2 | 785.36907 | 0.95654   |
| P29317 | Ephrin type-A receptor 2;Epithelial cell kinase;Tyrosine-protein kinase receptor ECK                                                                                                                                                                                                              | ECK;EPHA2                                                   | 1.58E-20 | 157.86 | _VIEDDPEATY(ph)TTSGGKIPIR_             | 10 | 2 | 1121.5356 | 0.63984   |
| P37802 | SM22-alpha homolog;Transgelin-2;Neuronal protein 22;Neuronal protein NP25;Transgelin-3                                                                                                                                                                                                            | CDABP0035;KIAA0120;TAGLN2;NP25;TAGLN3                       | 1.16E-18 | 160.69 | _GASQAGMTGY(ph)GMPR_                   | 10 | 2 | 732.29399 | -0.6792   |
| P29597 | Non-receptor tyrosine-protein kinase TYK2                                                                                                                                                                                                                                                         | TYK2                                                        | 1.24E-17 | 163.99 | _IIAQAEGEPCY(ph)IR_                    | 11 | 2 | 800.36547 | -0.35628  |
| P07355 | Annexin A2;Annexin II;Annexin-2;Calpactin I heavy chain;Calpactin-1 heavy chain;Chromobindin-8;Lipocortin II;p36;Placental anticoagulant protein IV;Protein I;Annexin A2 pseudogene 2;Lipocortin II pseudogene;Putative annexin A2-like protein                                                   | ANX2;ANX2L4;ANXA2;CAL1H;LPC2D;ANX2L2;ANX2P2;ANXA2P2;LPC2B   | 2.02E-17 | 183    | _SIYY(ph)YIQQDTK_                      | 4  | 2 | 751.33416 | -0.12221  |
| P54756 | EPH homology kinase 1;EPH-like kinase 7;Ephrin type-A receptor 5;EPH-like kinase 8;Ephrin type-A receptor 4;Tyrosine-protein kinase receptor SEK;Tyrosine-protein kinase TYRO1;EPH-like kinase 4;Ephrin type-A receptor 3;HEK;Tyrosine-protein kinase receptor ETK1;Tyrosine-protein kinase TYRO4 | EHK1;EPHA5;HEK7;EPA4;HEK8;SEK;TYRO1;EPA3;ETK;ETK1;HEK;TYRO4 | 2.36E-17 | 162.68 | _VIEDDPEAAY(ph)TTR_                    | 10 | 2 | 780.33489 | 0.60107   |
| P02786 | p90;T9;Transferrin receptor protein 1;Transferrin receptor protein 1, serum form                                                                                                                                                                                                                  | TFRC                                                        | 3.37E-17 | 152.37 | _SAFSNIFGGEPISY(ph)TR_                 | 14 | 2 | 913.41147 | 0.027932  |
| Q9NWX8 | Csk-binding protein;Phosphoprotein associated with glycosphingolipid-enriched microdomains 1;Transmembrane adapter protein PAG;Transmembrane phosphoprotein Cbp                                                                                                                                   | CBP;PAG;PAG1                                                | 7.98E-17 | 156.14 | _SPSSCNDIY(ph)ATVK_                    | 9  | 2 | 761.31819 | 0.34638   |
| Q96J84 | Kin of irregular chiasm-like protein 1;Kin of IRRE-like protein 1;Nephrin-like protein 1                                                                                                                                                                                                          | KIRREL;KIRREL1;NEPH1                                        | 3.36E-16 | 163.51 | _AIY(ph)SSFKDDVDIK_                    | 3  | 2 | 790.86583 | -0.061843 |
| Q99569 | p0071;Plakophilin-4                                                                                                                                                                                                                                                                               | PKP4                                                        | 9.62E-16 | 143.97 | _TVHDMEQFGQQYDIY(ph)ER_                | 16 | 3 | 789.6631  | 0.12344   |
| P52943 | Cysteine-rich protein 2;Protein ESP1                                                                                                                                                                                                                                                              | CRIP2;CRP2                                                  | 5.93E-15 | 133.95 | _GVNIGGAGSYIY(ph)EKPIAEGPQVTGPIEVPAAR_ | 12 | 3 | 1097.5534 | -0.063329 |
| Q99569 | p0071;Plakophilin-4                                                                                                                                                                                                                                                                               | PKP4                                                        | 1.15E-13 | 145.55 | _NNY(ph)JAINTATYAEYRPIQYR_             | 3  | 3 | 867.07075 | -0.46423  |
| Q96J84 | Kin of irregular chiasm-like protein 1;Kin of IRRE-like protein 1;Nephrin-like protein 1                                                                                                                                                                                                          | KIRREL;KIRREL1;NEPH1                                        | 2.20E-13 | 169.93 | _TPY(ph)EAYDPGK_                       | 3  | 2 | 667.28923 | 0.30148   |
| Q9NWX8 | Csk-binding protein;Phosphoprotein associated with glycosphingolipid-enriched microdomains 1;Transmembrane adapter protein PAG;Transmembrane phosphoprotein Cbp                                                                                                                                   | CBP;PAG;PAG1                                                | 2.98E-13 | 166.93 | _AEFAEY(ph)ASVDR_                      | 6  | 2 | 669.27411 | 0.19885   |
| P53801 | Pituitary tumor-transforming gene 1 protein-interacting protein;Pituitary tumor-transforming gene protein-binding factor                                                                                                                                                                          | C21orf1;C21orf3;PTTG1IP                                     | 3.48E-12 | 156.58 | _YGIFKEENPY(ph)AR_                     | 10 | 2 | 783.85306 | 0.077163  |

|        |                                                                                                                                                                                                                                                                                                                                                                                         |                                                           |          |        |                              |    |   |           |           |
|--------|-----------------------------------------------------------------------------------------------------------------------------------------------------------------------------------------------------------------------------------------------------------------------------------------------------------------------------------------------------------------------------------------|-----------------------------------------------------------|----------|--------|------------------------------|----|---|-----------|-----------|
| O95297 | Myelin protein zero-like protein 1;Protein zero-related                                                                                                                                                                                                                                                                                                                                 | MPZL1;PZR;UNQ849/PR01787                                  | 8.15E-12 | 177.06 | _SESVVY(ph)ADIR_             | 6  | 2 | 609.77374 | -0.27146  |
| Q6NZI2 | Cavin-1;Polymerase I and transcript release factor                                                                                                                                                                                                                                                                                                                                      | FKSG13;PTRF                                               | 1.62E-11 | 149.41 | _VM(ox)IY(ph)QDEVKIPAK_      | 4  | 3 | 543.93678 | 0.37557   |
| P54760 | Ephrin type-B receptor 4;Tyrosine-protein kinase receptor HTK;Tyrosine-protein kinase TYRO11                                                                                                                                                                                                                                                                                            | EPHB4;HTK;TYRO11                                          | 1.71E-11 | 133.86 | _FIEENSSDPTY(ph)TSSIGGK_     | 11 | 2 | 1006.4303 | 0.029376  |
| O60716 | Cadherin-associated Src substrate;Catenin delta-1;p120 catenin;p120(cas)                                                                                                                                                                                                                                                                                                                | CTNND1;KIAA0384                                           | 2.36E-11 | 132.97 | _INGPQDHSIIY(ph)STIPR_       | 12 | 3 | 676.66147 | 0.093833  |
| P40763 | Acute-phase response factor;Signal transducer and activator of transcription 3                                                                                                                                                                                                                                                                                                          | APRF;STAT3                                                | 2.53E-11 | 139.46 | _YCRPESQEHPADPGSAAPY(ph)IK_  | 20 | 3 | 861.3721  | -0.26684  |
| P56945 | Breast cancer anti-estrogen resistance protein 1;Cas scaffolding protein family member 1;CRK-associated substrate;p130cas                                                                                                                                                                                                                                                               | BCAR1;CAS;CASS1;CRKAS                                     | 4.69E-11 | 137.61 | _AQQGIY(ph)QVPGSPQFQSPPAK_   | 6  | 3 | 769.03861 | 0.18085   |
| Q9Y276 | BCS1-like protein;Mitochondrial chaperone BCS1                                                                                                                                                                                                                                                                                                                                          | BCS1;BCS1L                                                | 7.94E-11 | 138.21 | _TVMYTAGVSEWRPFY(ph)PR_      | 16 | 3 | 733.00273 | -0.40732  |
| Q6NZI2 | Cavin-1;Polymerase I and transcript release factor                                                                                                                                                                                                                                                                                                                                      | FKSG13;PTRF                                               | 1.90E-10 | 159.4  | _SFTPDHVVY(ph)AR_            | 9  | 3 | 457.87462 | 0.61308   |
| A6NI28 | Rho GTPase-activating protein 10-like;Rho GTPase-activating protein 42                                                                                                                                                                                                                                                                                                                  | ARHGAP42                                                  | 2.33E-10 | 138.97 | _KIWIEMADGKEPIY(ph)TIPIISK_  | 14 | 3 | 866.12139 | -0.35313  |
| P19174 | 1-phosphatidylinositol-4,5-bisphosphate phosphodiesterase gamma-1;Phosphoinositide phospholipase C-gamma-1;Phospholipase C-gamma-1;Phospholipase C-II;PLC-148                                                                                                                                                                                                                           | PLC1;PLCG1                                                | 2.54E-10 | 130.2  | _NPGFY(ph)VEANPMPTFK_        | 5  | 2 | 896.39423 | 0.3186    |
| Q9NUM4 | Transmembrane protein 106B                                                                                                                                                                                                                                                                                                                                                              | TMEM106B                                                  | 3.08E-10 | 128.22 | _NGDVSQFPY(ph)VEFTGR_        | 9  | 2 | 898.38799 | -0.07745  |
| P07355 | Annexin A2;Annexin II;Annexin-2;Calpactin I heavy chain;Calpactin-1 heavy chain;Chromobindin-8;Lipocortin II;p36;Placental anticoagulant protein IV;Protein I;Annexin A2 pseudogene 2;Lipocortin II pseudogene;Putative annexin A2-like protein                                                                                                                                         | ANX2;ANX2L4;ANXA2;CAL1H;LPC2D;ANX2L2;ANX2P2;ANXA2P2;LPC2B | 4.73E-09 | 138.71 | _SYSPY(ph)DMIESIRK_          | 5  | 3 | 556.91615 | -0.05809  |
| P06733 | 2-phospho-D-glycerate hydro-lyase;Alpha-enolase;C-myc promoter-binding protein;Enolase 1;MBP-1;MPB-1;Non-neural enolase;Phosphopyruvate hydratase;Plasminogen-binding protein;2-phospho-D-glycerate hydro-lyase;Beta-enolase;Enolase 3;Muscle-specific enolase;Skeletal muscle enolase;2-phospho-D-glycerate hydro-lyase;Enolase 2;Gamma-enolase;Neural enolase;Neuron-specific enolase | ENO1;ENO1L1;MPBP1;MPB1;ENO3;ENO2                          | 1.66E-08 | 124.78 | _AAVPSGASTGIY(ph)EAIEIR_     | 12 | 2 | 942.95878 | 0.26139   |
| P45984 | c-Jun N-terminal kinase 2;JNK-55;Mitogen-activated protein kinase 9;Stress-activated protein kinase JNK2                                                                                                                                                                                                                                                                                | JNK2;MAPK9;PRKM9                                          | 2.09E-08 | 126.1  | _TACTNFMTPY(ph)VVTR_         | 11 | 3 | 624.60118 | -0.038401 |
| P08670 | Vimentin                                                                                                                                                                                                                                                                                                                                                                                | VIM                                                       | 2.25E-08 | 172.23 | _FANY(ph)IDKVR_              | 4  | 2 | 603.28936 | -0.15263  |
| P07947 | p61-Yes;Proto-oncogene c-Yes;Proto-oncogene tyrosine-protein kinase Yes;p59-Fyn;Proto-oncogene c-Fyn;Proto-oncogene Syn;SLK;Tyrosine-protein kinase Fyn                                                                                                                                                                                                                                 | YES;YES1;FYN                                              | 2.31E-08 | 138.24 | _KIDNGGY(ph)YITTR_           | 7  | 2 | 740.84523 | 1.0172    |
| P49023 | Paxillin                                                                                                                                                                                                                                                                                                                                                                                | PXN                                                       | 3.95E-08 | 122.33 | _FIHQQPQSSS(ph)PVY(ph)GSSAK_ | 13 | 3 | 703.30104 | 0.651     |
| Q96RT1 | Densin-180-like protein;Erbb2-interacting protein;Protein LAP2                                                                                                                                                                                                                                                                                                                          | ERBB2IP;ERBIN;KIAA1225;LAP2                               | 4.23E-08 | 128.85 | _RAQIPEGDY(ph)JSYR_          | 9  | 3 | 549.92241 | 0.038024  |
| Q99569 | p0071;Plakophilin-4                                                                                                                                                                                                                                                                                                                                                                     | PKP4                                                      | 5.79E-08 | 124.07 | _SAVSPDIHITPIY(ph)EGR_       | 13 | 2 | 917.94039 | 0.2845    |
| O60716 | Cadherin-associated Src substrate;Catenin delta-1;p120 catenin;p120(cas)                                                                                                                                                                                                                                                                                                                | CTNND1;KIAA0384                                           | 6.84E-08 | 127.87 | _SIDNNY(ph)STPNER_           | 6  | 2 | 745.30138 | -0.3899   |
| P42685 | FYN-related kinase;Nuclear tyrosine protein kinase RAK;Protein-tyrosine kinase 5;Tyrosine-protein kinase FRK                                                                                                                                                                                                                                                                            | FRK;PTK5;RAK                                              | 7.18E-08 | 125.72 | _HGHY(ph)FVAIFDYQAR_         | 4  | 3 | 601.93828 | 0.0071844 |
| Q68CZ2 | Tensin-3;Tensin-like SH2 domain-containing protein 1;Tumor endothelial marker 6                                                                                                                                                                                                                                                                                                         | TEM6;TENS1;TNS3;PPP                                       | 9.14E-08 | 116.78 | _KISIGQY(ph)DNDAGGQIPFSK_    | 7  | 3 | 706.66829 | 0.4896    |

|        |                                                                                                                                                                                                                                   |                                                                   |          |        |                                         |    |   |           |           |
|--------|-----------------------------------------------------------------------------------------------------------------------------------------------------------------------------------------------------------------------------------|-------------------------------------------------------------------|----------|--------|-----------------------------------------|----|---|-----------|-----------|
| Q68CZ2 | Tensin-3;Tensin-like SH2 domain-containing protein 1;Tumor endothelial marker 6                                                                                                                                                   | TEM6;TENS1;TNS3;TPP                                               | 1.70E-07 | 120.77 | _ESMCSTPAFPVSPETPY(ph)VK_               | 17 | 2 | 1103.9755 | 0.16656   |
| Q9Y490 | Talin-1                                                                                                                                                                                                                           | KIAA1027;TLN;TLN1                                                 | 1.73E-07 | 122.78 | _TMQFEPSTMVY(ph)DACR_                   | 11 | 2 | 958.37485 | -0.27415  |
| P07947 | p61-Yes;Proto-oncogene c-Yes;Proto-oncogene tyrosine-protein kinase Yes;p59-Fyn;Proto-oncogene c-Fyn;Proto-oncogene Syn;SLK;Tyrosine-protein kinase Fyn;pp60c-src;Proto-oncogene c-Src;Proto-oncogene tyrosine-protein kinase Src | YES;YES1;FYN;SRC;SRC1                                             | 4.98E-07 | 135.55 | _WTAPEAAIY(ph)GR_                       | 9  | 2 | 657.79755 | 0.14977   |
| Q05397 | Focal adhesion kinase 1;pp125FAK;Protein-tyrosine kinase 2                                                                                                                                                                        | FAK;FAK1;PTK2                                                     | 5.78E-07 | 101.94 | _THAVSVSETDDY(ph)AEIIDEEDTYTMPSTR_      | 12 | 3 | 1085.7902 | 0.07297   |
| O15061 | Desmuslin;Synemin                                                                                                                                                                                                                 | DMN;KIAA0353;SYN;SYNM                                             | 6.61E-07 | 118.87 | _EVPVY(ph)IGEDSTIAR_                    | 5  | 2 | 814.88201 | 0.12203   |
| O00461 | Golgi integral membrane protein 4;Golgi integral membrane protein, cis;Golgi phosphoprotein 4;Golgi-localized phosphoprotein of 130 kDa                                                                                           | GIMPC;GOLIM4;GOLPH4;GPP130                                        | 2.44E-06 | 125.18 | _GREEHY(ph)EEEEEEEDGAVAEK_              | 6  | 3 | 882.01173 | 0.36511   |
| P62158 | Calmodulin                                                                                                                                                                                                                        | CALM;CALM1;CALM2;CALM3;CALML2;CAM;CAM1;CAM2;CAM3;CAMB;CAMC;CAMIII | 3.24E-06 | 119.69 | _VFDKDGNGY(ph)ISAAEIR_                  | 9  | 3 | 612.28389 | 0.046848  |
| Q9UDY2 | Tight junction protein 2;Tight junction protein ZO-2;Zona occludens protein 2;Zonula occludens protein 2                                                                                                                          | TJP2;X104;ZO2                                                     | 3.68E-06 | 118.76 | _IEIAQKHPDIY(ph)AVPIK_                  | 11 | 3 | 639.00781 | 0.30085   |
| Q68CZ2 | Tensin-3;Tensin-like SH2 domain-containing protein 1;Tumor endothelial marker 6                                                                                                                                                   | TEM6;TENS1;TNS3;TPP                                               | 5.78E-06 | 105.35 | _WDS(ph)YENISADGVEIHTQGVPVDSIY(ph)h)AK_ | 25 | 3 | 1037.7722 | 0.23132   |
| P05388 | 60S acidic ribosomal protein P0;60S ribosomal protein L10E;60S acidic ribosomal protein P0-like                                                                                                                                   | RPLP0                                                             | 9.29E-06 | 163.64 | _IJIIDDY(ph)PK_                         | 8  | 2 | 649.32561 | 0.22752   |
| Q8IWW6 | Rho GTPase-activating protein 12;Rho-type GTPase-activating protein 12                                                                                                                                                            | ARHGAP12                                                          | 1.08E-05 | 116.13 | _AT(ph)TPPNQGRPDS(ph)PVY(ph)ANIQEIK_    | 15 | 3 | 879.378   | 0.091275  |
| Q99569 | p0071;Plakophilin-4                                                                                                                                                                                                               | PKP4                                                              | 1.30E-05 | 122.33 | _STTNY(ph)VDFYSTK_                      | 5  | 2 | 753.31343 | 0.13094   |
| P05141 | Adenine nucleotide translocator 2;ADP,ATP carrier protein 2;ADP,ATP carrier protein, fibroblast isoform;ADP/ATP translocase 2;Solute carrier family 25 member 5                                                                   | ANT2;SLC25A5                                                      | 1.80E-05 | 123.88 | _AAAY(ph)FGIYDTAK_                      | 3  | 2 | 650.28649 | -0.11073  |
| Q9Y2X7 | ARF GTPase-activating protein GIT1;Cool-associated and tyrosine-phosphorylated protein 1;G protein-coupled receptor kinase-interactor 1;GRK-interacting protein 1                                                                 | GIT1                                                              | 2.24E-05 | 107.41 | _IQPFHSTEIEDDAIY(ph)SVHVPAGIYR_         | 15 | 3 | 979.79881 | 0.17479   |
| Q8IY95 | Transmembrane protein 192                                                                                                                                                                                                         | TMEM192                                                           | 2.39E-05 | 106.35 | _AKPEPDIIEEKIY(ph)AYPSNITSETGFR_        | 14 | 3 | 1059.8391 | 0.21904   |
| P54753 | EPH-like kinase 2;Ephrin type-B receptor 3;Tyrosine-protein kinase TYRO6                                                                                                                                                          | EPHB3;ETK2;HEK2;TYRO6                                             | 2.61E-05 | 138.98 | _IQQY(ph)IAPGMK_                        | 4  | 2 | 614.79342 | 0.50878   |
| Q9NWO8 | Csk-binding protein;Phosphoprotein associated with glycosphingolipid-enriched microdomains 1;Transmembrane adapter protein PAG;Transmembrane phosphoprotein Cbp                                                                   | CBP;PAG;PAG1                                                      | 3.16E-05 | 104.44 | _DSSSQENMVEDCIY(ph)ETVK_                | 14 | 2 | 1107.4343 | -0.25358  |
| P07948 | Tyrosine-protein kinase Lyn                                                                                                                                                                                                       | LYN                                                               | 3.45E-05 | 115.29 | _SIDNGGY(ph)YISPR_                      | 7  | 2 | 711.30848 | -0.089595 |
| P22626 | Heterogeneous nuclear ribonucleoproteins A2/B1                                                                                                                                                                                    | HNRNPA2B1;HNRPA2B1                                                | 4.06E-05 | 102.39 | _NMGGPYGGGNGYGGGGGGGGY(ph)GR_           | 22 | 3 | 757.29541 | 0.32713   |
| Q05397 | Focal adhesion kinase 1;pp125FAK;Protein-tyrosine kinase 2                                                                                                                                                                        | FAK;FAK1;PTK2                                                     | 4.13E-05 | 151.44 | _YMEDSTY(ph)Y(ph)KASK_                  | 8  | 2 | 823.29828 | 0.052333  |
| Q05397 | Focal adhesion kinase 1;pp125FAK;Protein-tyrosine kinase 2                                                                                                                                                                        | FAK;FAK1;PTK2                                                     | 4.13E-05 | 151.44 | _YMEDSTY(ph)Y(ph)KASK_                  | 7  | 2 | 823.29828 | 0.052333  |

|        |                                                                                                                                                                                                                                                                                    |                                                                                                                                                                                                                                                                             |             |        |                                  |   |   |           |           |
|--------|------------------------------------------------------------------------------------------------------------------------------------------------------------------------------------------------------------------------------------------------------------------------------------|-----------------------------------------------------------------------------------------------------------------------------------------------------------------------------------------------------------------------------------------------------------------------------|-------------|--------|----------------------------------|---|---|-----------|-----------|
| P19174 | 1-phosphatidylinositol-4,5-bisphosphate phosphodiesterase gamma-1;Phosphoinositide phospholipase C-gamma-1;Phospholipase C-gamma-1;Phospholipase C-II;PLC-148                                                                                                                      | PLC1;PLCG1                                                                                                                                                                                                                                                                  | 5.88E-05    | 109.15 | _IGTAEPTY(ph)GAIYEGR_            | 8 | 2 | 846.36927 | 0.11105   |
| Q86Z02 | Homeodomain-interacting protein kinase 1;Homeodomain-interacting protein kinase 2                                                                                                                                                                                                  | HIPK1;KIAA0630;HIPK2                                                                                                                                                                                                                                                        | 0.000101964 | 135.55 | _AVCSTY(ph)IQSR_                 | 6 | 2 | 632.77322 | 0.80537   |
| Q9H422 | Androgen receptor-interacting nuclear protein kinase;Fas interacting serine/threonine-protein kinase;Homeodomain-interacting protein kinase 3;Homolog of protein kinase YAK1                                                                                                       | DYRK6;FIST3;HIPK3;PKY                                                                                                                                                                                                                                                       | 0.000161161 | 132.88 | _TVCSTY(ph)IQSR_                 | 6 | 2 | 647.7785  | -0.029696 |
| P07948 | Tyrosine-protein kinase Lyn;Hemopoietic cell kinase;p59-HCK/p60-HCK;Tyrosine-protein kinase HCK                                                                                                                                                                                    | LYN;HCK                                                                                                                                                                                                                                                                     | 0.000203065 | 130.98 | _VIEDNEY(ph)TAR_                 | 7 | 2 | 645.27411 | 0.81073   |
| Q9Y6N7 | Deleted in U twenty twenty;H-Robo-1;Roundabout homolog 1                                                                                                                                                                                                                           | DUTT1;ROBO1                                                                                                                                                                                                                                                                 | 0.000618688 | 112.13 | _NGITSTY(ph)AGIR_                | 7 | 2 | 616.78718 | -0.67231  |
| Q14511 | Cas scaffolding protein family member 2;CRK-associated substrate-related protein;Enhancer of filamentation 1;Enhancer of filamentation 1 p55;Neural precursor cell expressed developmentally down-regulated protein 9;p105;Renal carcinoma antigen NY-REN-12                       | CASL;CASS2;NEDD9                                                                                                                                                                                                                                                            | 0.00113419  | 108.35 | _TGHGYVY(ph)EYPSR_               | 7 | 2 | 754.81393 | 0.14492   |
| P04626 | Metastatic lymph node gene 19 protein;p185erbB2;Proto-oncogene c-ErbB-2;Proto-oncogene Neu;Receptor tyrosine-protein kinase erbB-2;Tyrosine kinase-type cell surface receptor HER2                                                                                                 | ERBB2;HER2;MLN19;NEU;NGL                                                                                                                                                                                                                                                    | 0.0011417   | 108.89 | _IIDIDETEVY(ph)HADGGKVPIK_       | 9 | 3 | 731.68735 | 0.12318   |
| Q9H5Y7 | SLIT and NTRK-like protein 6                                                                                                                                                                                                                                                       | SLITRK6                                                                                                                                                                                                                                                                     | 0.00121181  | 91.355 | _ANIHAEPDY(ph)IEVIEQQT_          | 9 | 2 | 1025.4619 | 0.16866   |
| Q13671 | Ras and Rab interactor 1;Ras inhibitor JC99;Ras interaction/interference protein 1                                                                                                                                                                                                 | RIN1                                                                                                                                                                                                                                                                        | 0.00156177  | 88.071 | _EKPAQDPIY(ph)DVPNASGGQAGGQRPGR_ | 9 | 3 | 948.11379 | -0.055101 |
| Q9Y4G6 | Talin-2                                                                                                                                                                                                                                                                            | KIAA0320;TLN2                                                                                                                                                                                                                                                               | 0.00160058  | 92.538 | _ECDY(ph)SIDGINR_                | 4 | 2 | 711.27378 | 0.63188   |
| O60674 | Janus kinase 2;Tyrosine-protein kinase JAK2                                                                                                                                                                                                                                        | JAK2                                                                                                                                                                                                                                                                        | 0.00165454  | 96.673 | _REVGDY(ph)GQIHETEVIK_           | 6 | 3 | 689.33665 | -0.010315 |
| P68104 | Elongation factor 1-alpha 1;Elongation factor Tu;Eukaryotic elongation factor 1 A-1;Leukocyte receptor cluster member 7;Eukaryotic elongation factor 1 A-like 3;Putative elongation factor 1-alpha-like 3;Elongation factor 1-alpha 2;Eukaryotic elongation factor 1 A-2;Statin-S1 | EEF1A;EEF1A1;EF1A;LENG7;EEF1AL3;EEF1A2;EEF1AL;STN                                                                                                                                                                                                                           | 0.0022359   | 103.08 | _EHAIAY(ph)TIGVK_                | 7 | 2 | 697.85761 | 0.21926   |
| Q07912 | Activated CDC42 kinase 1;Tyrosine kinase non-receptor protein 2                                                                                                                                                                                                                    | ACK1;TNK2                                                                                                                                                                                                                                                                   | 0.00237983  | 101.42 | _VSSTHY(ph)YIIPERPSYIER_         | 6 | 3 | 764.03498 | 0.11051   |
| Q07912 | Activated CDC42 kinase 1;Tyrosine kinase non-receptor protein 2                                                                                                                                                                                                                    | ACK1;TNK2                                                                                                                                                                                                                                                                   | 0.00237983  | 101.42 | _VSSTHY(ph)YIIPERPSYIER_         | 7 | 3 | 764.03498 | 0.11051   |
| P62805 | Histone H4                                                                                                                                                                                                                                                                         | H4/A;H4/B;H4/C;H4/D;H4/E;H4/G;H4/H;H4/I;H4/J;H4/K;H4/M;H4/N;H4/O;H4F2;H4FA;H4FB;H4FC;H4FD;H4FE;H4FG;H4FH;H4FI;H4FJ;H4FK;H4FM;H4FN;H4FO;HIST1H4A;HIST1H4B;HIST1H4C;HIST1H4D;HIST1H4E;HIST1H4F;HIST1H4H;HIST1H4I;HIST1H4J;HIST1H4K;HIST1H4L;HIST2H4;HIST2H4A;HIST2H4B;HIST4H4 | 0.00259363  | 111.61 | _ISGIY(ph)EETR_                  | 6 | 2 | 630.79722 | 0.18207   |

|        |                                                                                                                                                                                                                                                                                    |                                                   |            |        |                          |    |   |           |           |
|--------|------------------------------------------------------------------------------------------------------------------------------------------------------------------------------------------------------------------------------------------------------------------------------------|---------------------------------------------------|------------|--------|--------------------------|----|---|-----------|-----------|
| P30530 | AXL oncogene;Tyrosine-protein kinase receptor UFO                                                                                                                                                                                                                                  | AXL;UFO                                           | 0.00281166 | 139.88 | _KIYNGDY(ph)YR_          | 7  | 2 | 636.27645 | -0.019143 |
| P05556 | Fibronectin receptor subunit beta;Integrin beta-1;VLA-4 subunit beta                                                                                                                                                                                                               | FNRB;ITGB1;MDF2;MSK12                             | 0.00369143 | 109.66 | _WDTGENPIY(ph)K_         | 9  | 2 | 651.77374 | 0.29504   |
| Q96HC4 | Enigma homolog;Enigma-like PDZ and LIM domains protein;PDZ and LIM domain protein 5                                                                                                                                                                                                | ENH;L9;PDLIM5                                     | 0.00472536 | 92.19  | _YTEFY(ph)HVPTSDASK_     | 5  | 3 | 621.26461 | -1.0231   |
| Q60716 | Cadherin-associated Src substrate;Catenin delta-1;p120 catenin;p120(cas)                                                                                                                                                                                                           | CTNND1;KIAA0384                                   | 0.00478616 | 100.88 | _QDVY(ph)GPQPQVR_        | 4  | 2 | 683.81119 | 0.09893   |
| O43491 | Band 4.1-like protein 2;Generally expressed protein 4.1                                                                                                                                                                                                                            | EPB41L2                                           | 0.00591832 | 132.01 | _VEGDNIY(ph)VR_          | 7  | 2 | 572.75535 | -0.14516  |
| P35222 | Beta-catenin;Catenin beta-1                                                                                                                                                                                                                                                        | CTNNB;CTNNB1;OK/SW-cl.35;PRO2286                  | 0.00600556 | 105.57 | _IHY(ph)GIPVVVK_         | 3  | 2 | 602.82812 | -0.11522  |
| Q5SSJ5 | Heterochromatin protein 1-binding protein 3;Protein HP1-BP74                                                                                                                                                                                                                       | HP1BP3                                            | 0.00764973 | 87.647 | _YVIENHPGTNSNY(ph)QMHIK_ | 13 | 3 | 780.02772 | -0.081882 |
| Q9BY49 | 2,4-dienoyl-CoA reductase-related protein;HPDHase;Peroxisomal trans-2-enoyl-CoA reductase;pVI-ARL                                                                                                                                                                                  | PECR;PRO1004                                      | 0.00834588 | 97.798 | _AGVY(ph)NITK_           | 4  | 2 | 473.2257  | -0.28267  |
| P56945 | Breast cancer anti-estrogen resistance protein 1;Cas scaffolding protein family member 1;CRK-associated substrate;p130cas                                                                                                                                                          | BCAR1;CAS;CASS1;CRKAS                             | 0.00991404 | 80.746 | _HIIAPGPQDIY(ph)DVPPVR_  | 11 | 3 | 656.33106 | -0.002609 |
| Q9Y3B3 | Transmembrane emp24 domain-containing protein 7                                                                                                                                                                                                                                    | CGI-109;TMED7                                     | 0.0155733  | 99.5   | _KQY(ph)DSFTFTASK_       | 3  | 2 | 751.83179 | -0.27437  |
| P46783 | 40S ribosomal protein S10                                                                                                                                                                                                                                                          | RPS10                                             | 0.0195452  | 122.52 | _IAIY(ph)EIIFK_          | 4  | 2 | 595.31706 | 0.027738  |
| Q96QZ7 | Atrophin-1-interacting protein 3;BAI1-associated protein 1;Membrane-associated guanylate kinase inverted 1;Membrane-associated guanylate kinase, WW and PDZ domain-containing protein 1;Trinucleotide repeat-containing gene 19 protein;WW domain-containing protein 3             | AIP3;BAIAP1;BAP1;MAGI1;TNRC19                     | 0.0196685  | 79.633 | _IEDPVY(ph)GIYYVDHINRK_  | 6  | 3 | 725.34878 | -0.36377  |
| P68104 | Elongation factor 1-alpha 1;Elongation factor Tu;Eukaryotic elongation factor 1 A-1;Leukocyte receptor cluster member 7;Eukaryotic elongation factor 1 A-like 3;Putative elongation factor 1-alpha-like 3;Elongation factor 1-alpha 2;Eukaryotic elongation factor 1 A-2;Statin-S1 | EEF1A;EEF1A1;EF1A;LENG7;EEF1AL3;EEF1A2;EEF1AL;STN | 0.037377   | 93.178 | _STTGHIIY(ph)K_          | 9  | 2 | 600.78665 | 0.073073  |

**Supplementary Table 2.** Patient demographics for the specimens on the annotated melanoma TMA.

| Demographics                                                     | Frequency (N=94)             | Percent |
|------------------------------------------------------------------|------------------------------|---------|
| Male                                                             | 55                           | 58.5%   |
| Age (mean)                                                       | 64 years (range 37-88 years) |         |
| Stage at surgery                                                 |                              |         |
| II                                                               | 15                           | 16.0%   |
| III                                                              | 43                           | 45.7%   |
| IV                                                               | 36                           | 38.3%   |
| Site of tumor specimen                                           |                              |         |
| Primary/cutaneous                                                | 24                           | 25.5%   |
| LN met                                                           | 25                           | 26.6%   |
| Dermal/SC met                                                    | 23                           | 24.5%   |
| Visceral met                                                     | 22                           | 23.4%   |
| Free of disease after surgery*                                   | 76                           | 80.9%   |
| *No gross margins or other metastatic disease at time of surgery |                              |         |

**Supplementary Table 3.** Median overall survival data for melanoma patients represented on the TMA based upon PTEN staining status.

| Status  | Event Rate | Median Survival (months) | 95% CI (months) |
|---------|------------|--------------------------|-----------------|
| PTEN-   | 24/34      | 16.8                     | 10.9-22.7       |
| PTEN+   | 29/59      | 40.0                     | 23.7-56.3       |
| Overall | 53/93      | 23.0                     | 7.8-38.2        |

**Supplementary Table 4.** Median overall survival data for melanoma patients represented on the TMA based upon PTEN and FN staining status.

| Status          | Event Rate | Median Survival (months) | 95% CI (months) |
|-----------------|------------|--------------------------|-----------------|
| FN low / PTEN-  | 5/8        | 28.3                     | 0.4-56.2        |
| FN high / PTEN- | 19/26      | 15.1                     | 10.8-19.4       |
| FN low / PTEN+  | 6/17       | 45.2                     | 0.1-90.3        |
| FN high / PTEN+ | 23/41      | 29.9                     | 12.8-47.0       |
| Overall         | 53/92      | 23.0                     | 11.3-34.7       |

# Proteomic Work-flow

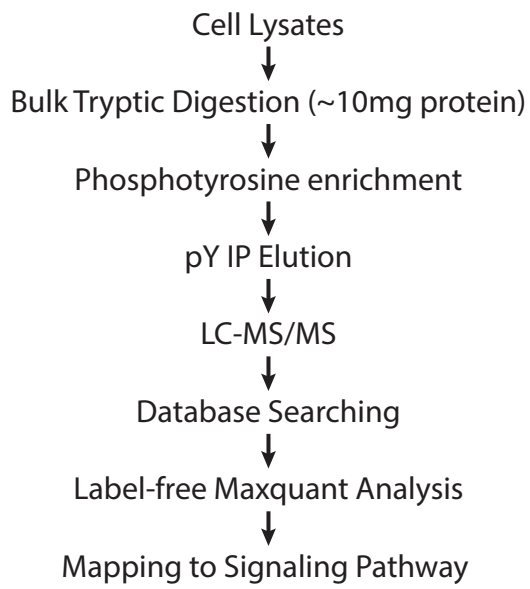

**Supplementary Figure 1.** Work flow of the phospho-proteomics experiment.



### log-dose vs response

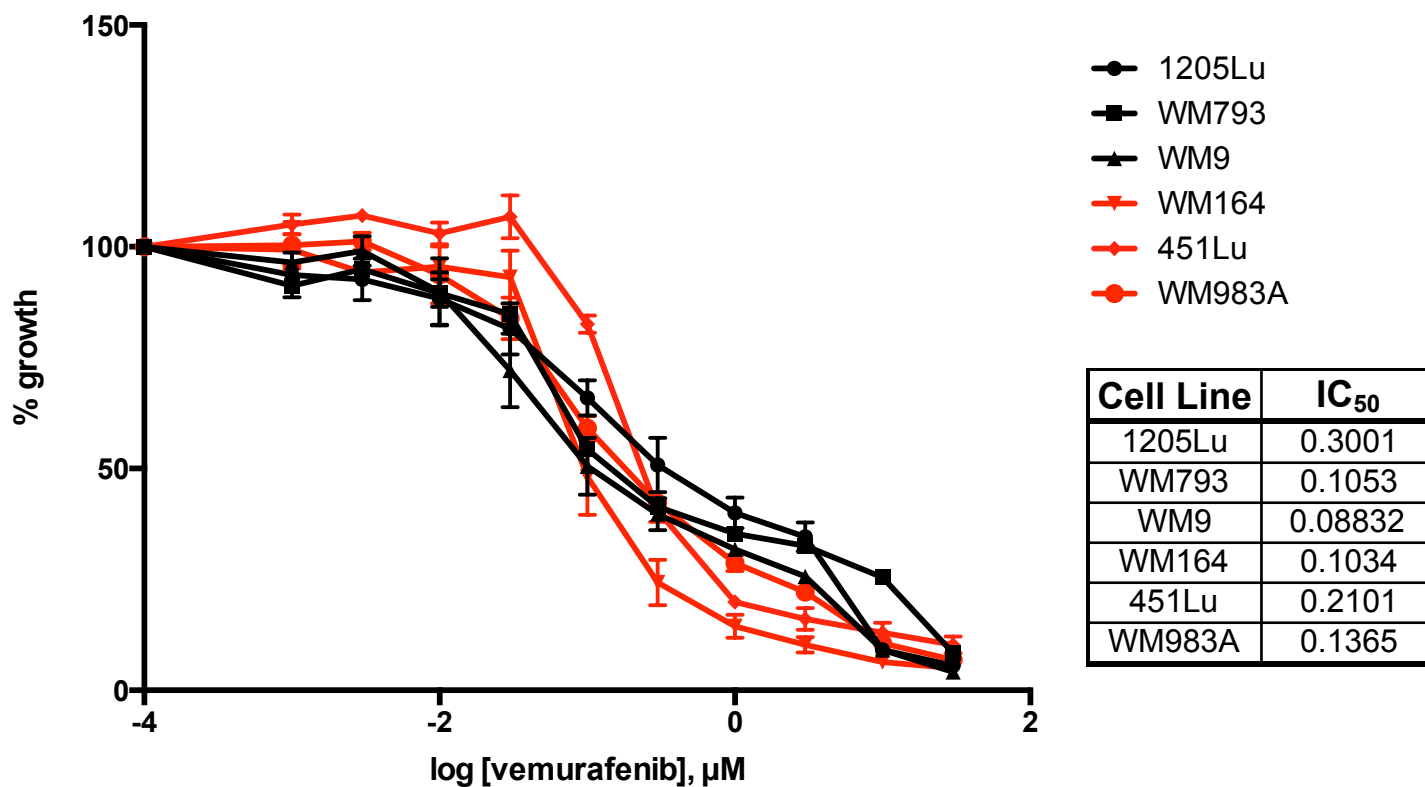

**Supplementary Figure 2.** MTT growth inhibition assay. Three BRAFV600E PTEN- (black) and three BRAFV600E PTEN+ (red) cell lines were used for an MTT growth inhibition assay following 72 hour treatment with vemurafenib. IC<sub>50</sub> values were calculated using GraphPad Prism 6 software.

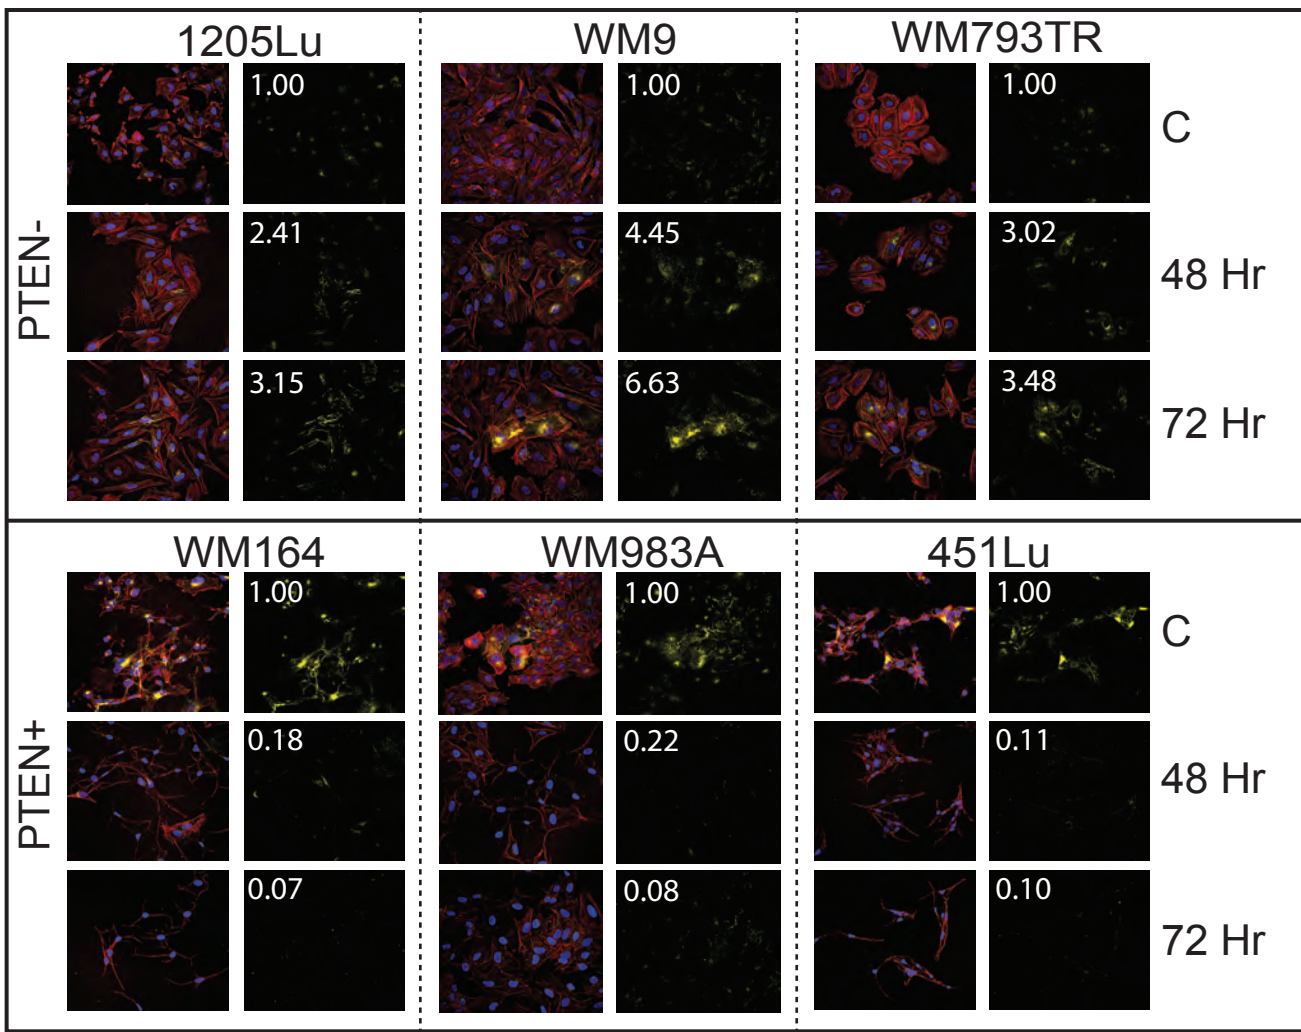

**Supplementary Figure 3.** Vemurafenib induces FN expression in BRAFV600E/PTEN- melanoma cell lines. Immunofluorescence staining showing the induction of FN expression (yellow) following 48- and 72-hour 3 $\mu$ M vemurafenib treatment. Fold changes calculated based on total fluorescence intensity of the yellow (FN) channel per cell.

1205Lu 72Hr 3 $\mu$ M vemurafenib

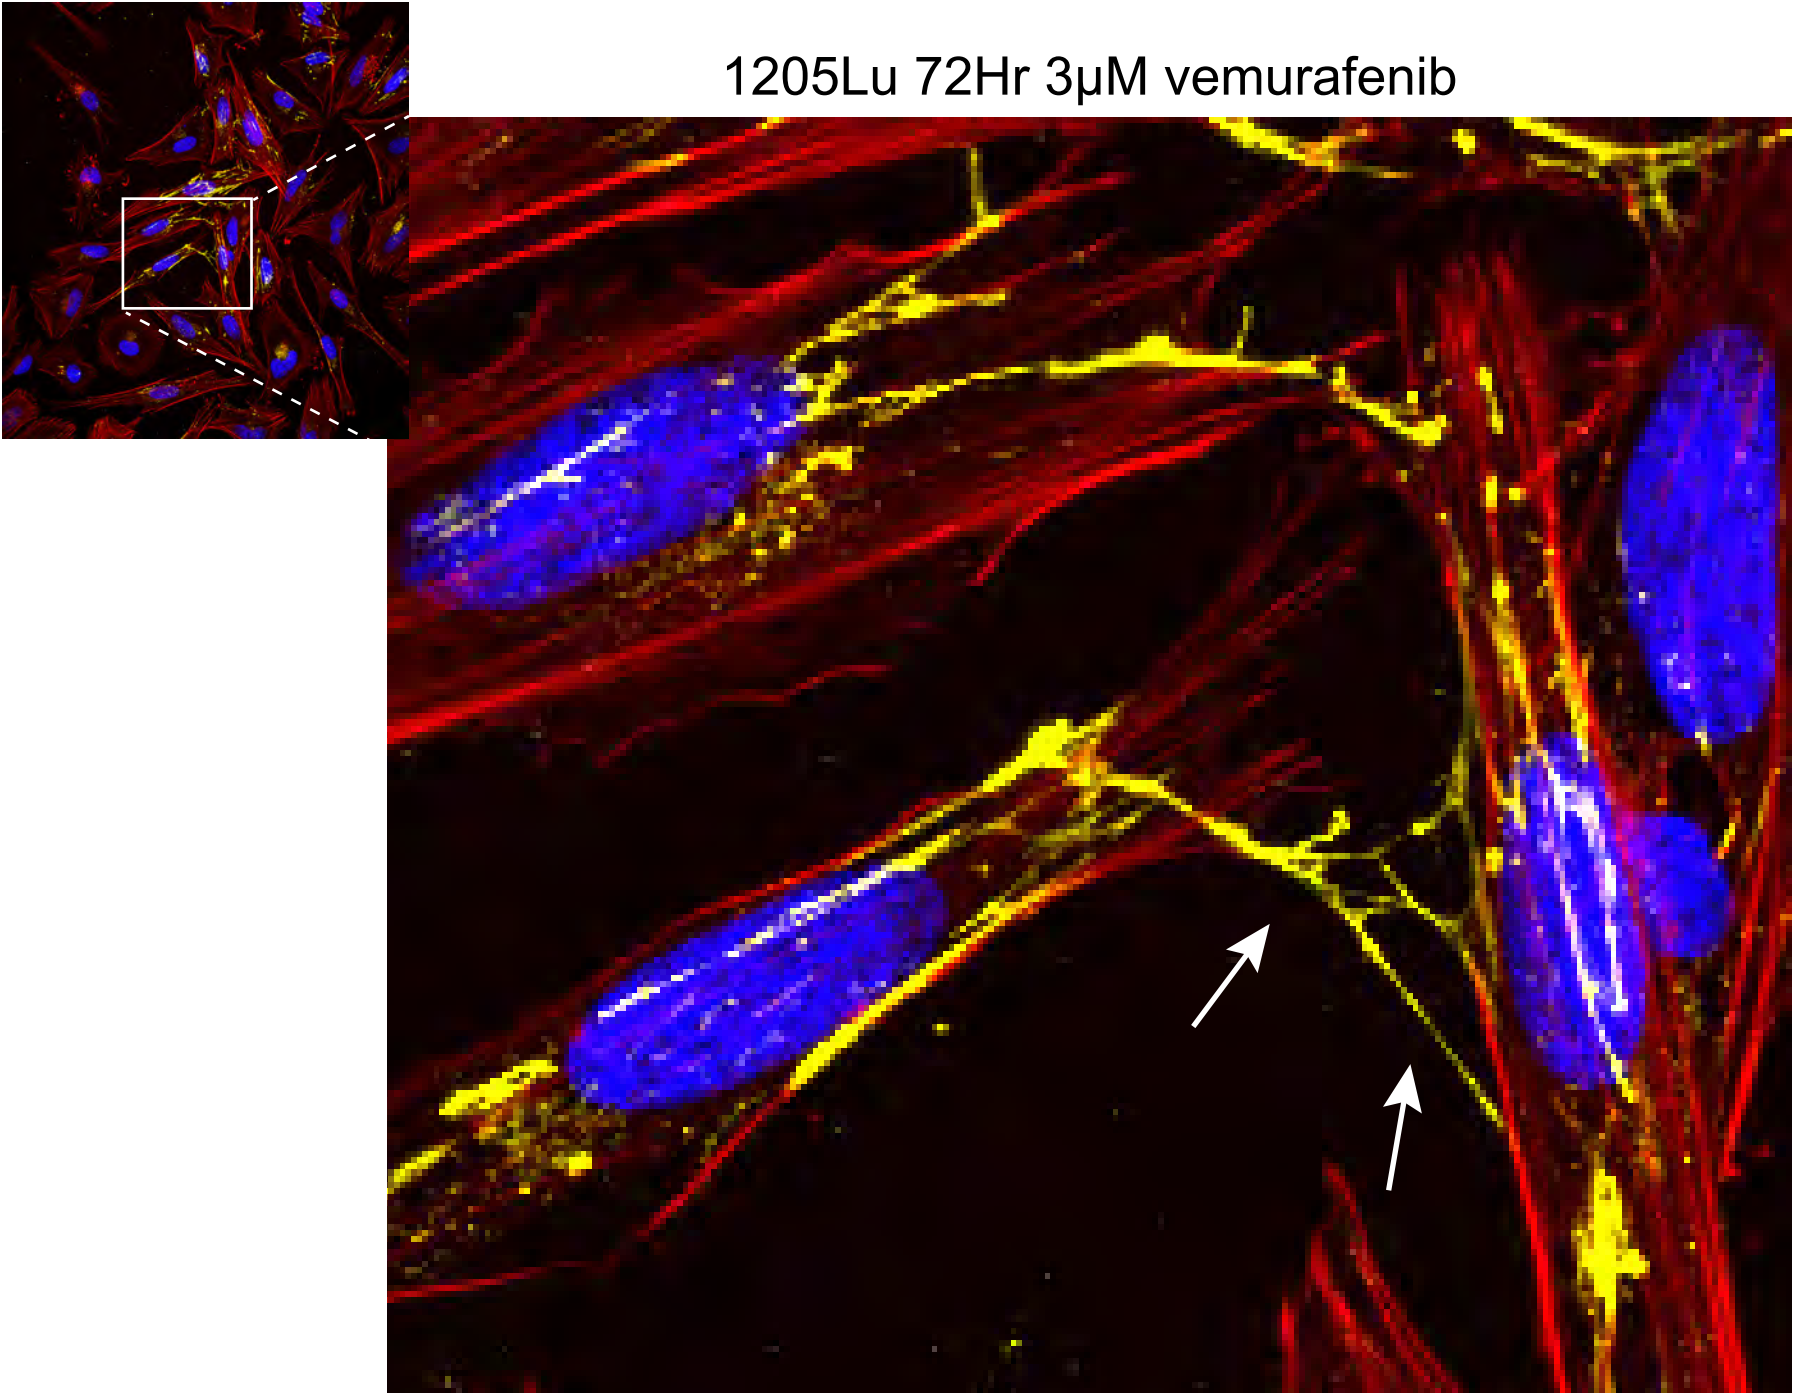

**Supplementary Figure 4.** Close-up image of immunofluorescent staining of FN (yellow), actin (Phalloidin, red), and the nucleus (DAPI, blue) showing extracellular FN deposition in 1205Lu following a 72-hour 3  $\mu$ M vemurafenib treatment.

WM9 72Hr 3 $\mu$ M vemurafenib

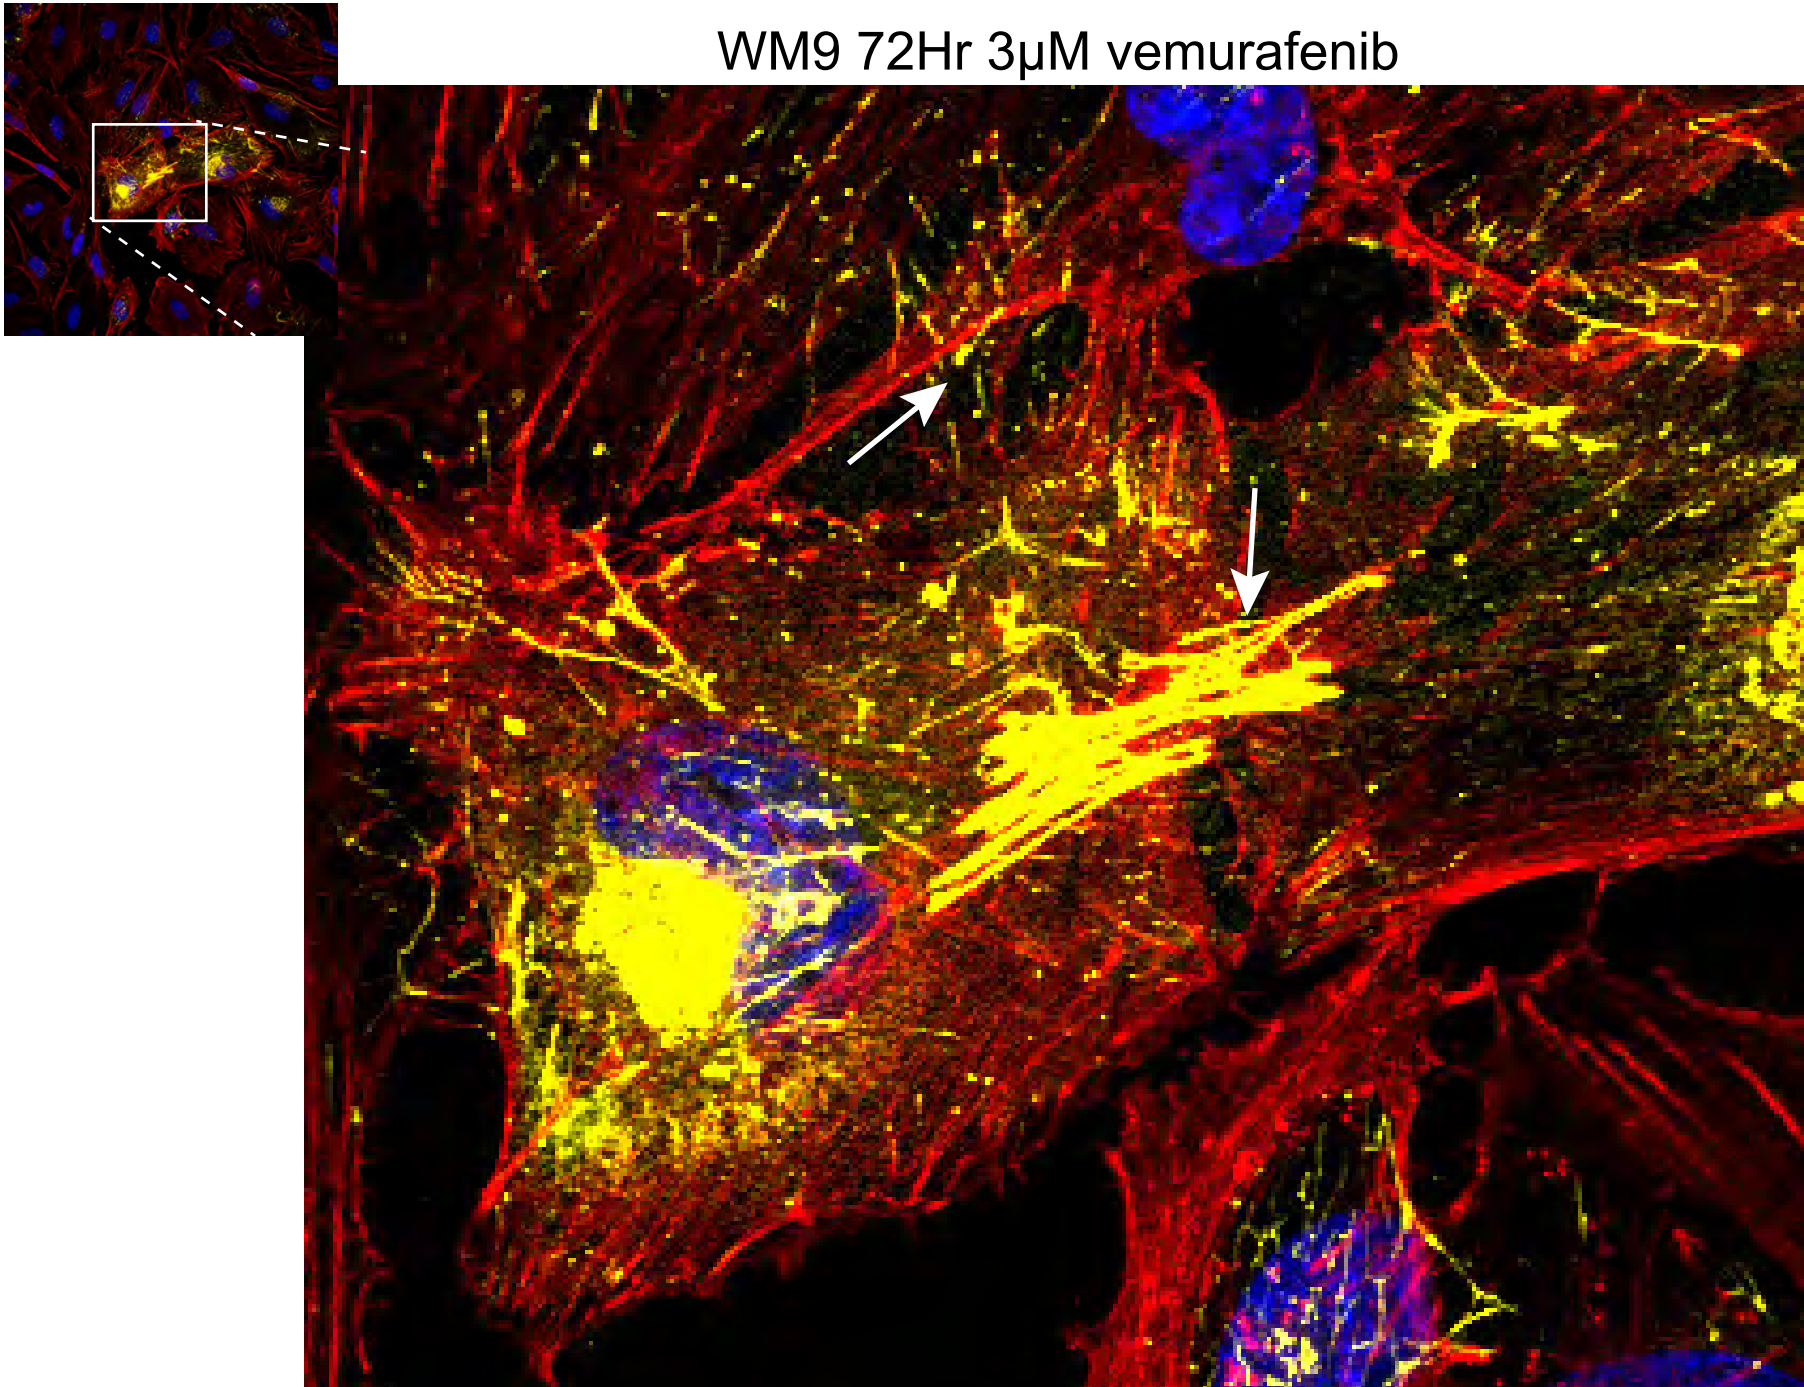

**Supplementary Figure 5.** Close-up image of immunofluorescent staining of FN (yellow), actin (Phalloidin, red), and the nucleus (DAPI, blue) showing extracellular FN deposition in WM9 following a 72-hour 3  $\mu$ M vemurafenib treatment.

## 1205Lu BRAF siRNA

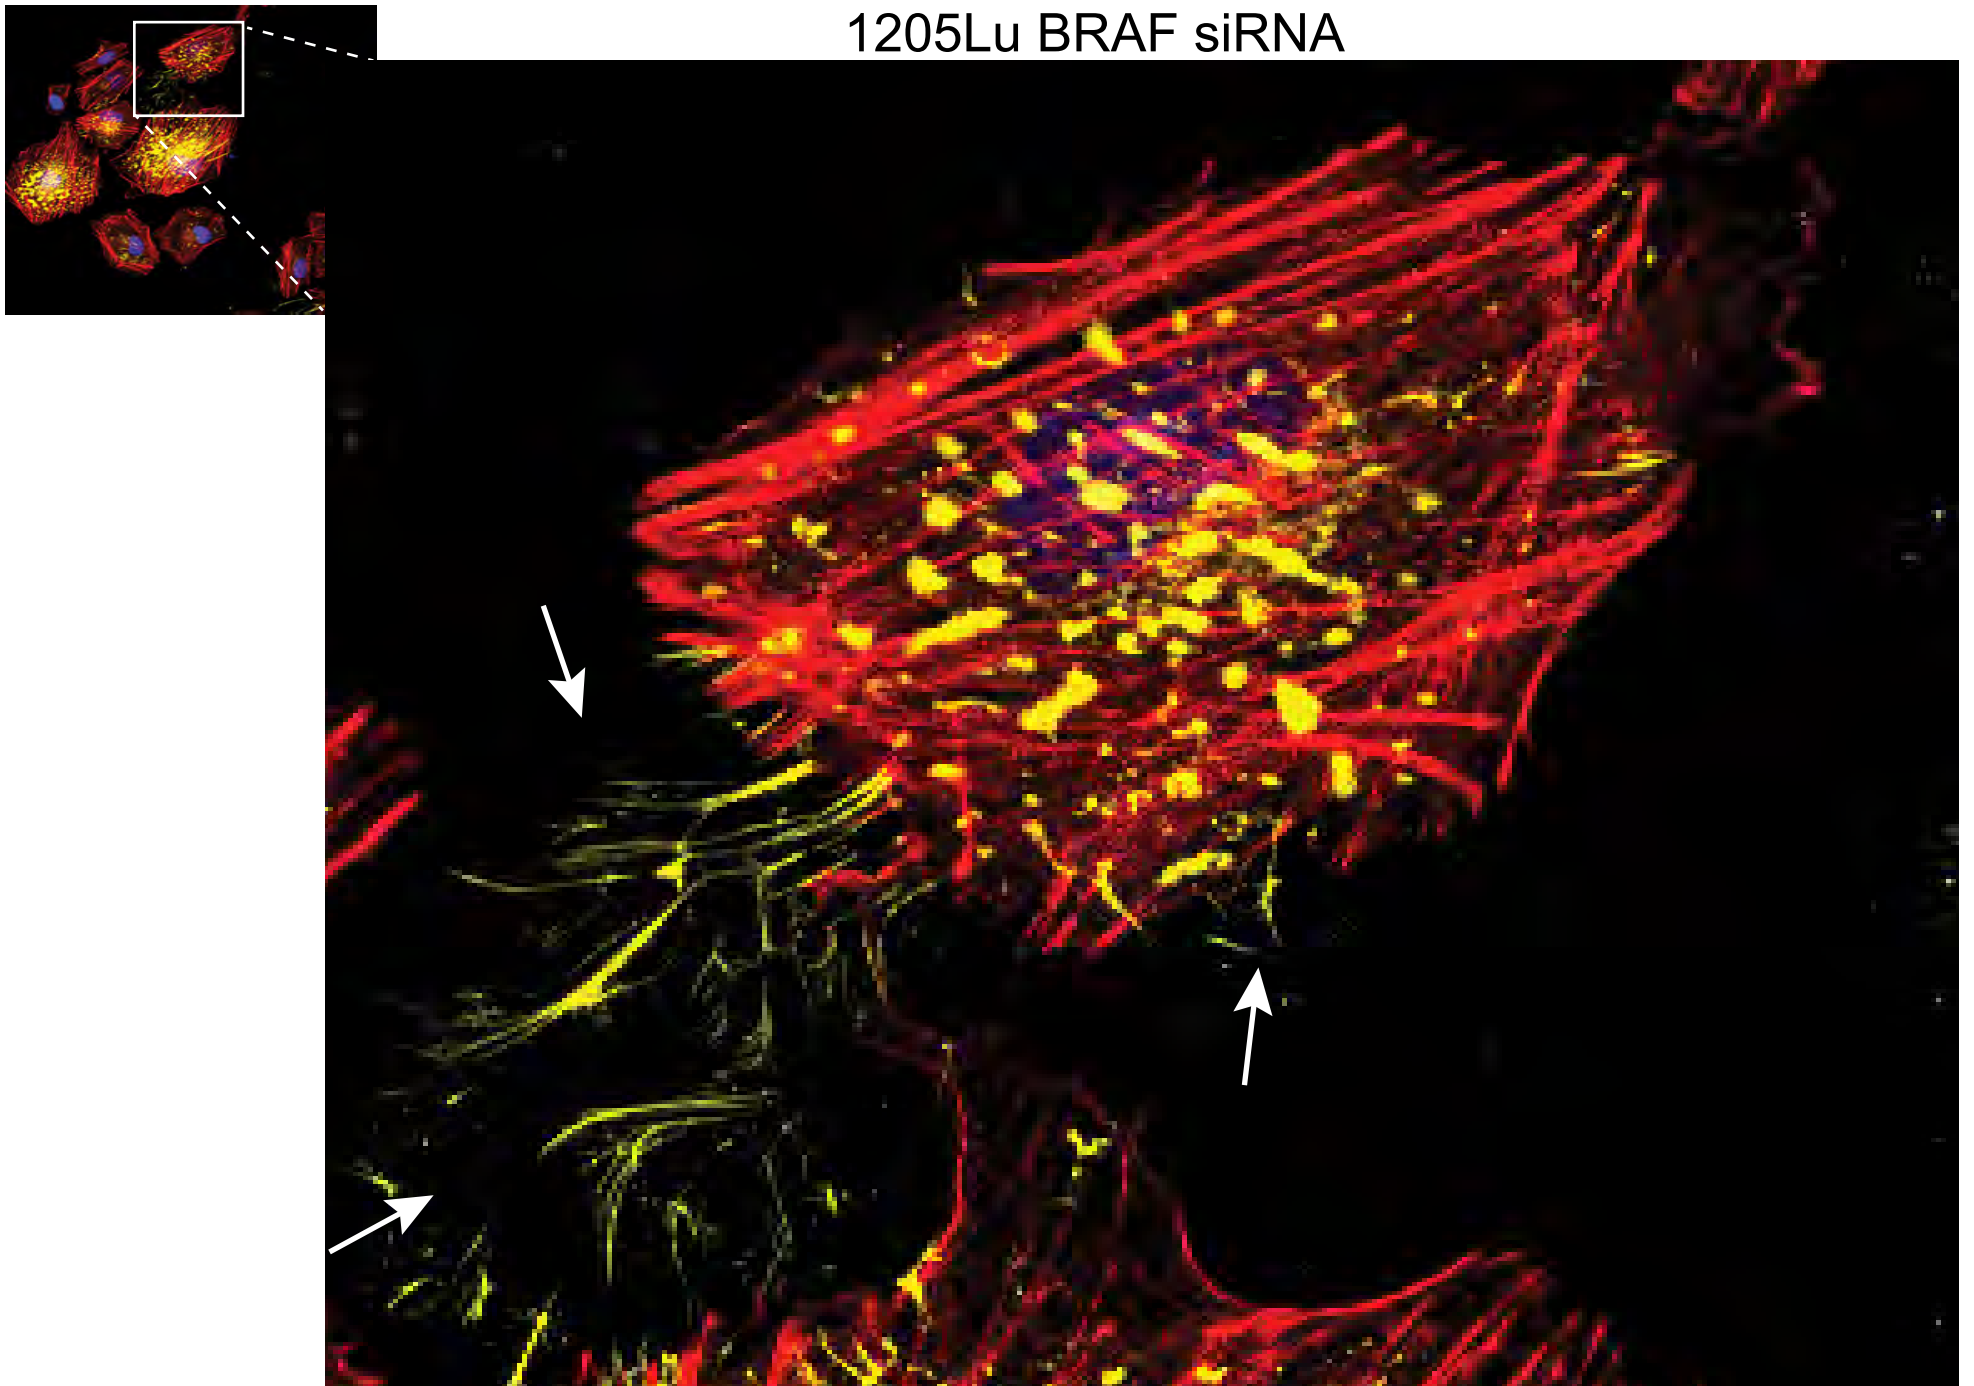

**Supplementary Figure 6.** Close-up image of immunofluorescent staining of FN (yellow), actin (Phalloidin, red), and the nucleus (DAPI, blue) showing extracellular FN deposition in 1205Lu following a siRNA-mediated knockdown of BRAF.

# 1205Lu BRAF siRNA

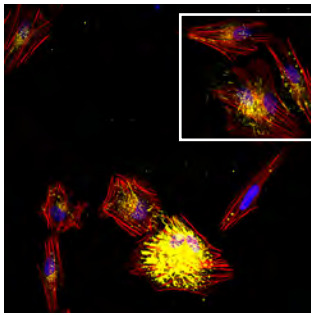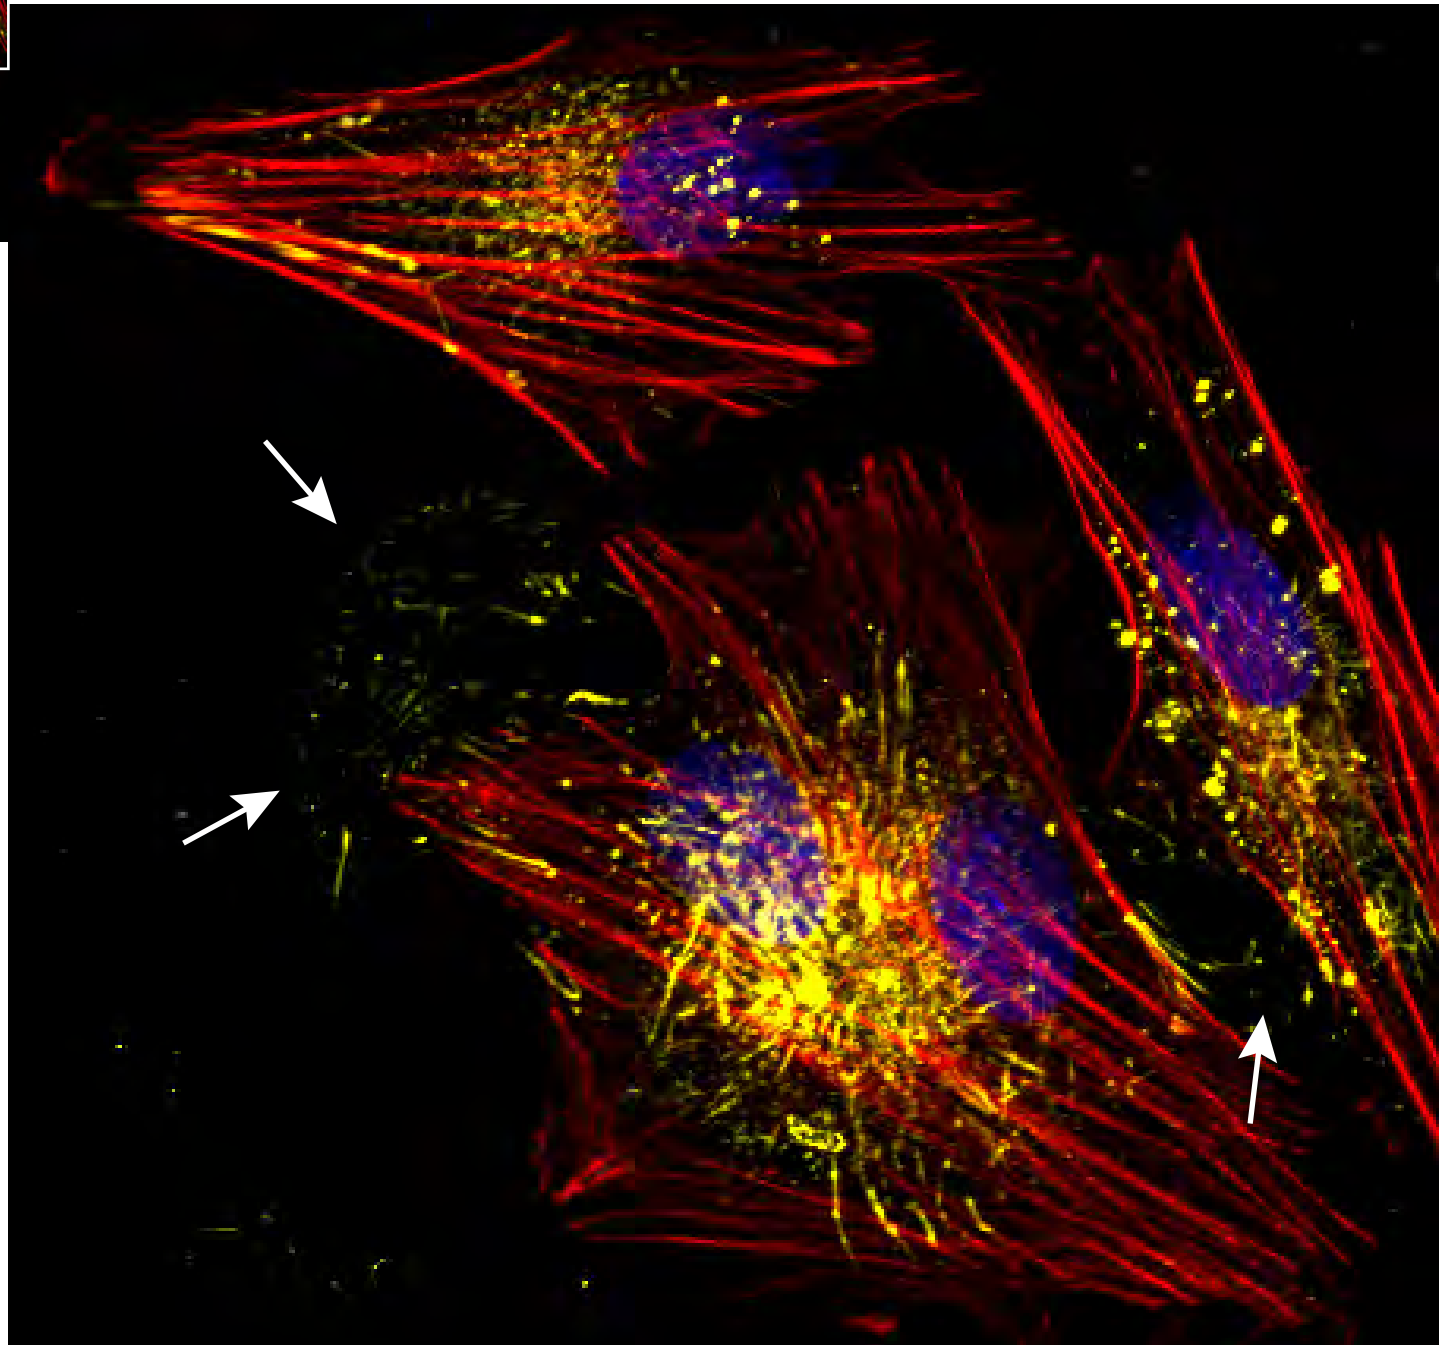

**Supplementary Figure 7.** Close-up image of immunofluorescent staining of FN (yellow), actin (Phalloidin, red), and the nucleus (DAPI, blue) showing extracellular FN deposition in 1205Lu following a siRNA-mediated knockdown of BRAF.

# 1205Lu

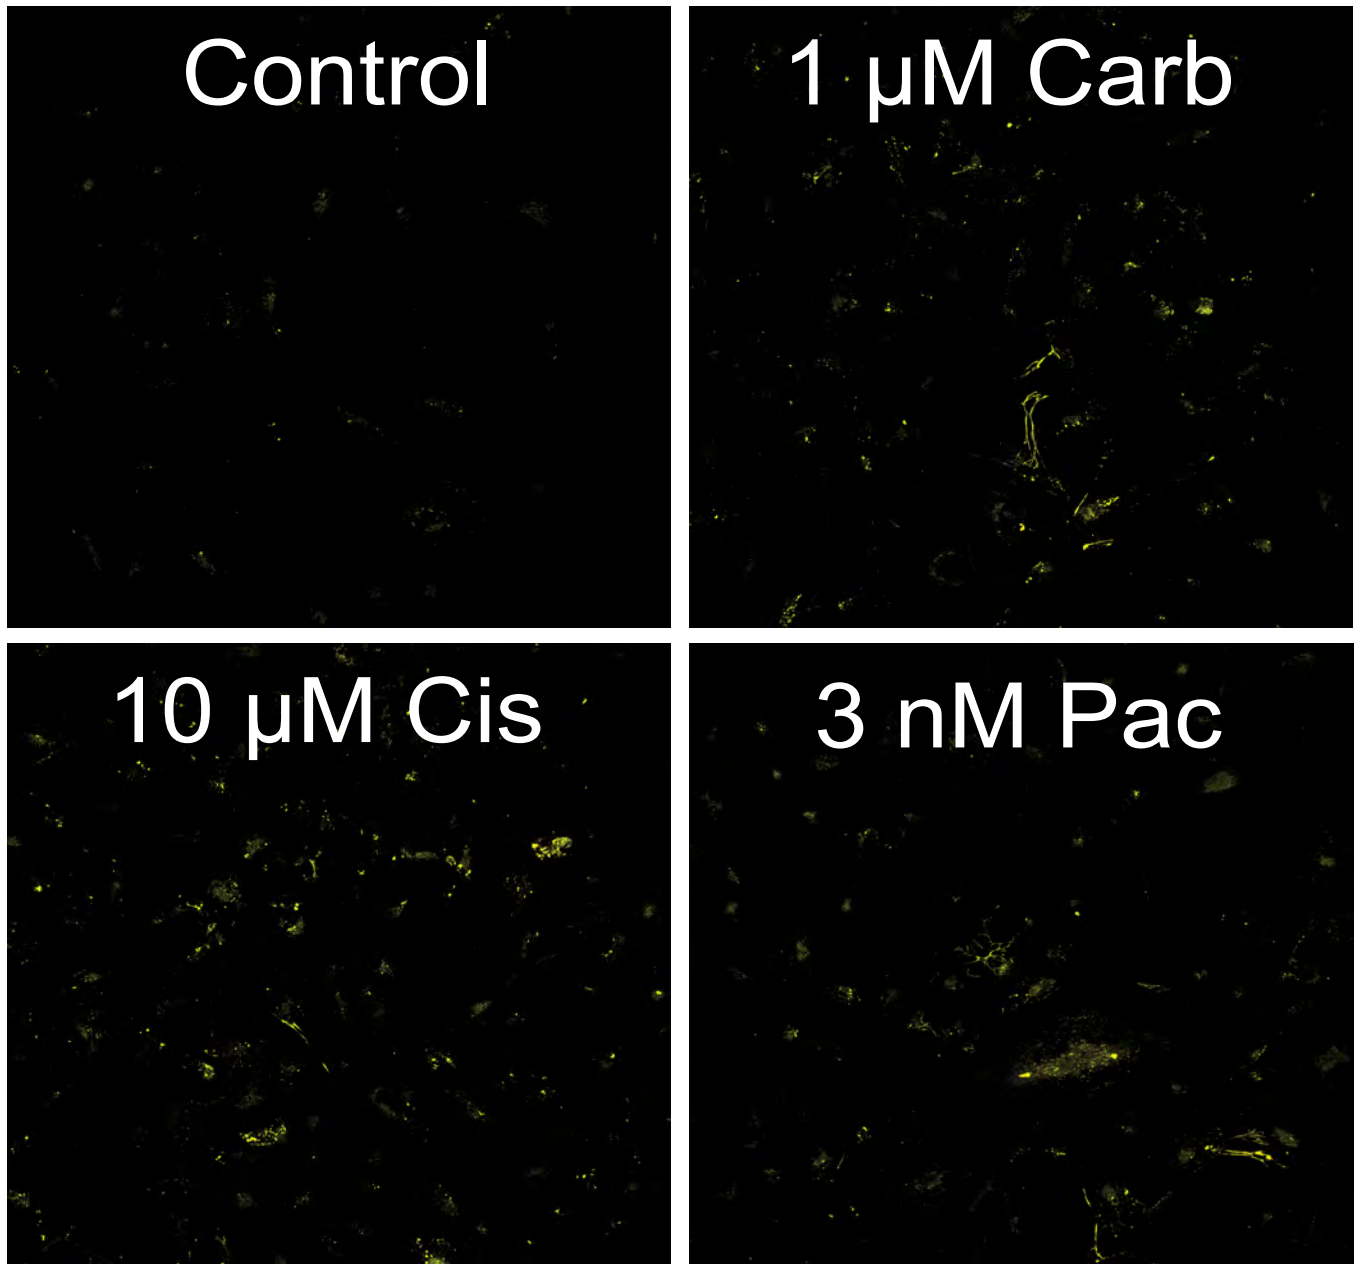

**Supplementary Figure 8.** Cytotoxic chemotherapy induces FN expression in 1205Lu PTEN-melanoma cells. Cells were treated with 10 $\mu$ M cisplatin, 1 $\mu$ M carboplatin and 3nM paclitaxel for 72 hours before being stained for FN (yellow).



1205Lu 1  $\mu$ M carboplatin 72 hours

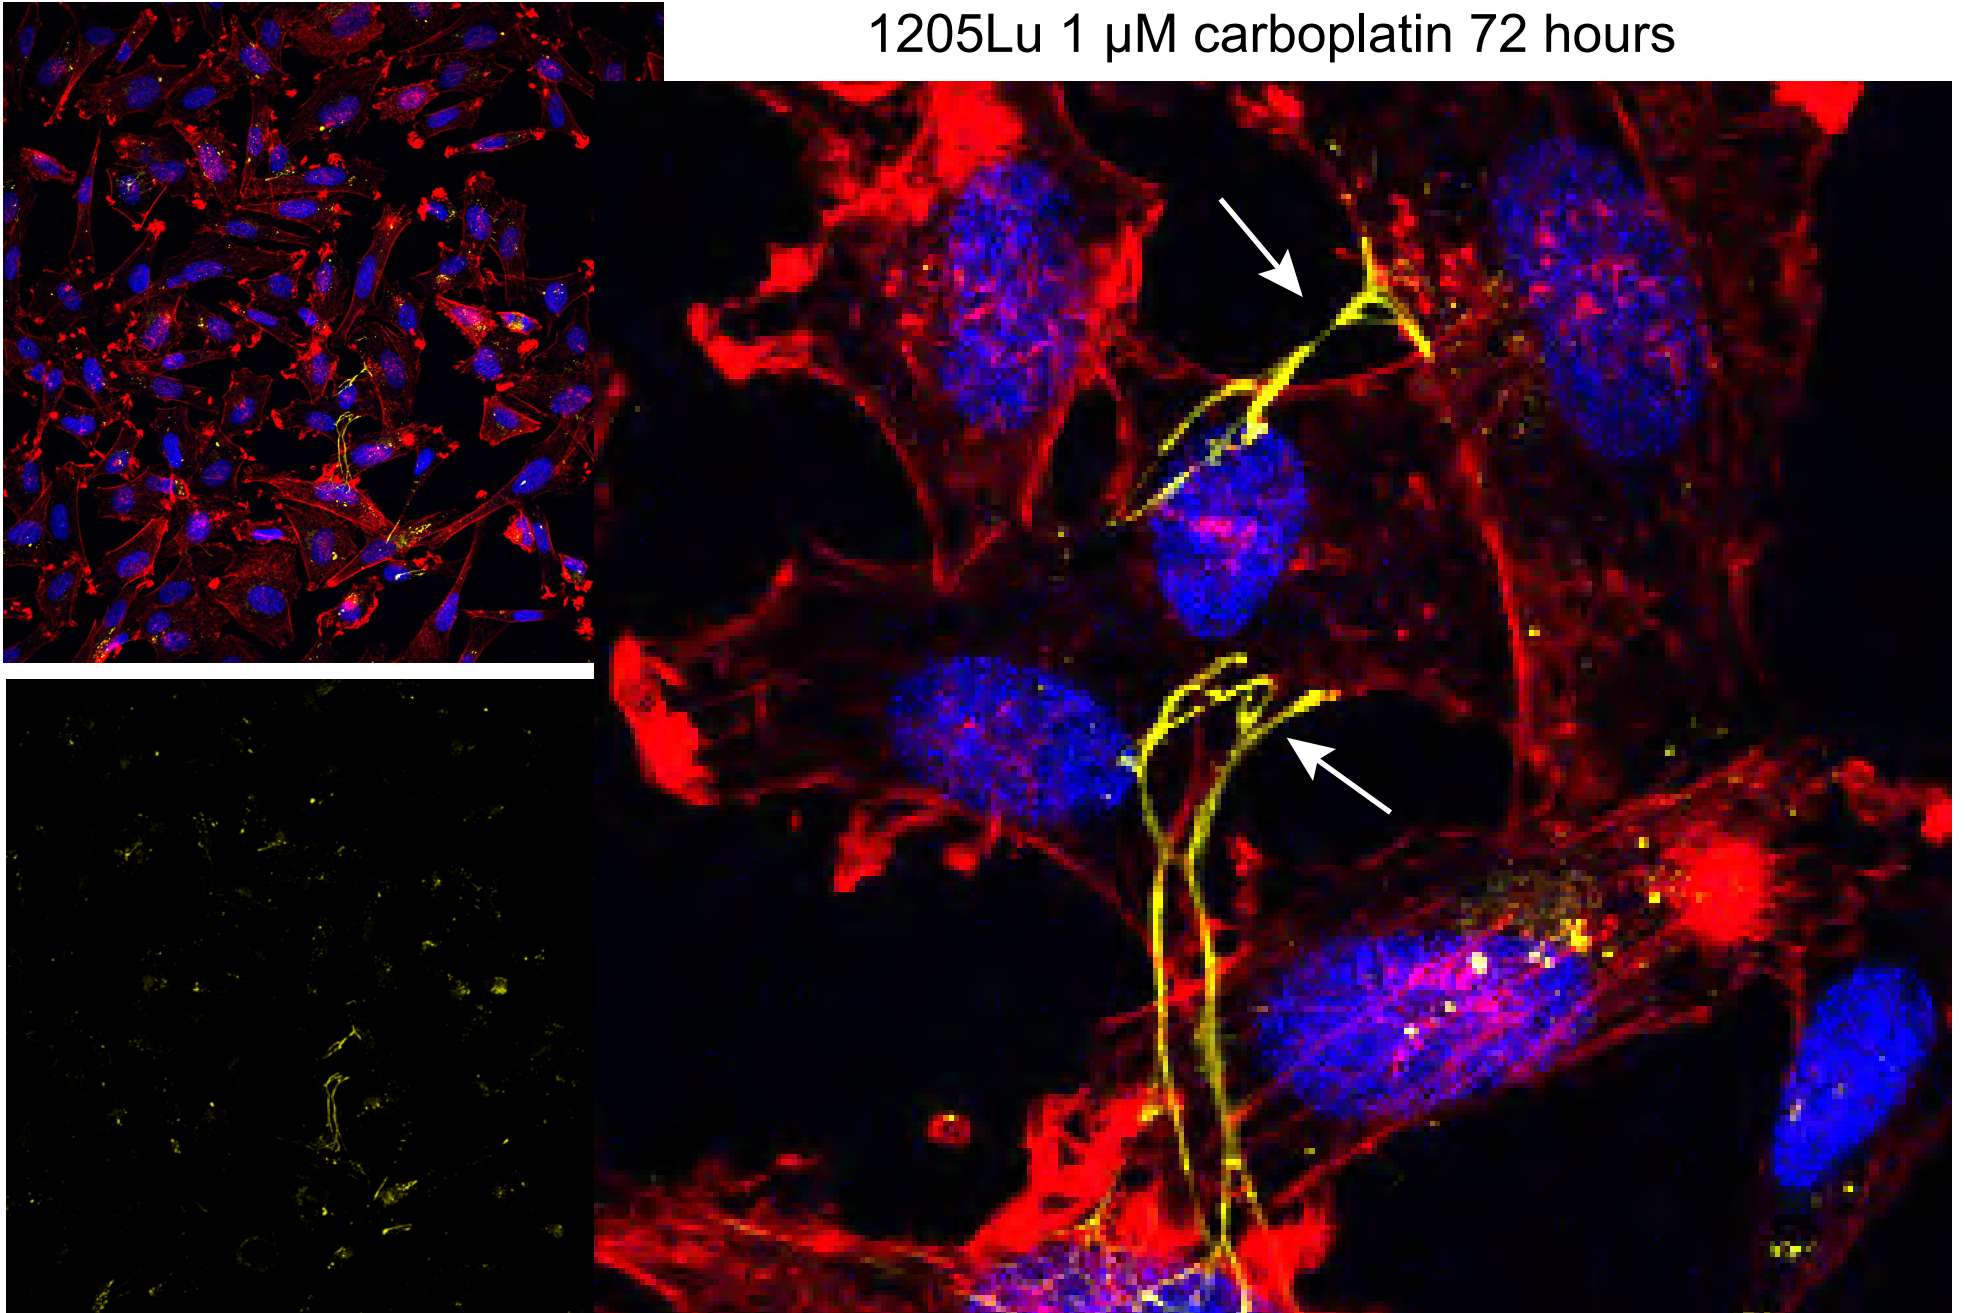

**Supplementary Figure 9.** Close-up image of immunofluorescent staining of FN (yellow), actin (Phalloidin, red), and the nucleus (DAPI, blue) showing extracellular FN deposition in 1205Lu following a 72-hour 1 $\mu$ M carboplatin treatment.



**A**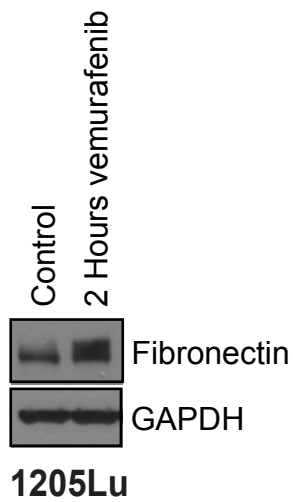**B**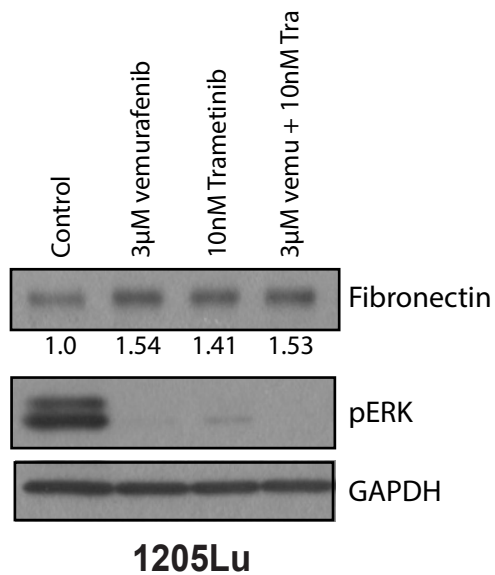

**Supplementary Figure 10. A:** Western blot of 1205Lu lysates showing FN upregulation after a 2-hour treatment with 3 $\mu$ M vemurafenib. **B:** Western blot showing FN upregulation in 1205Lu with the combination of vemurafenib and trametinib (3 $\mu$ M, 10nM respectively, 2 hour treatment).

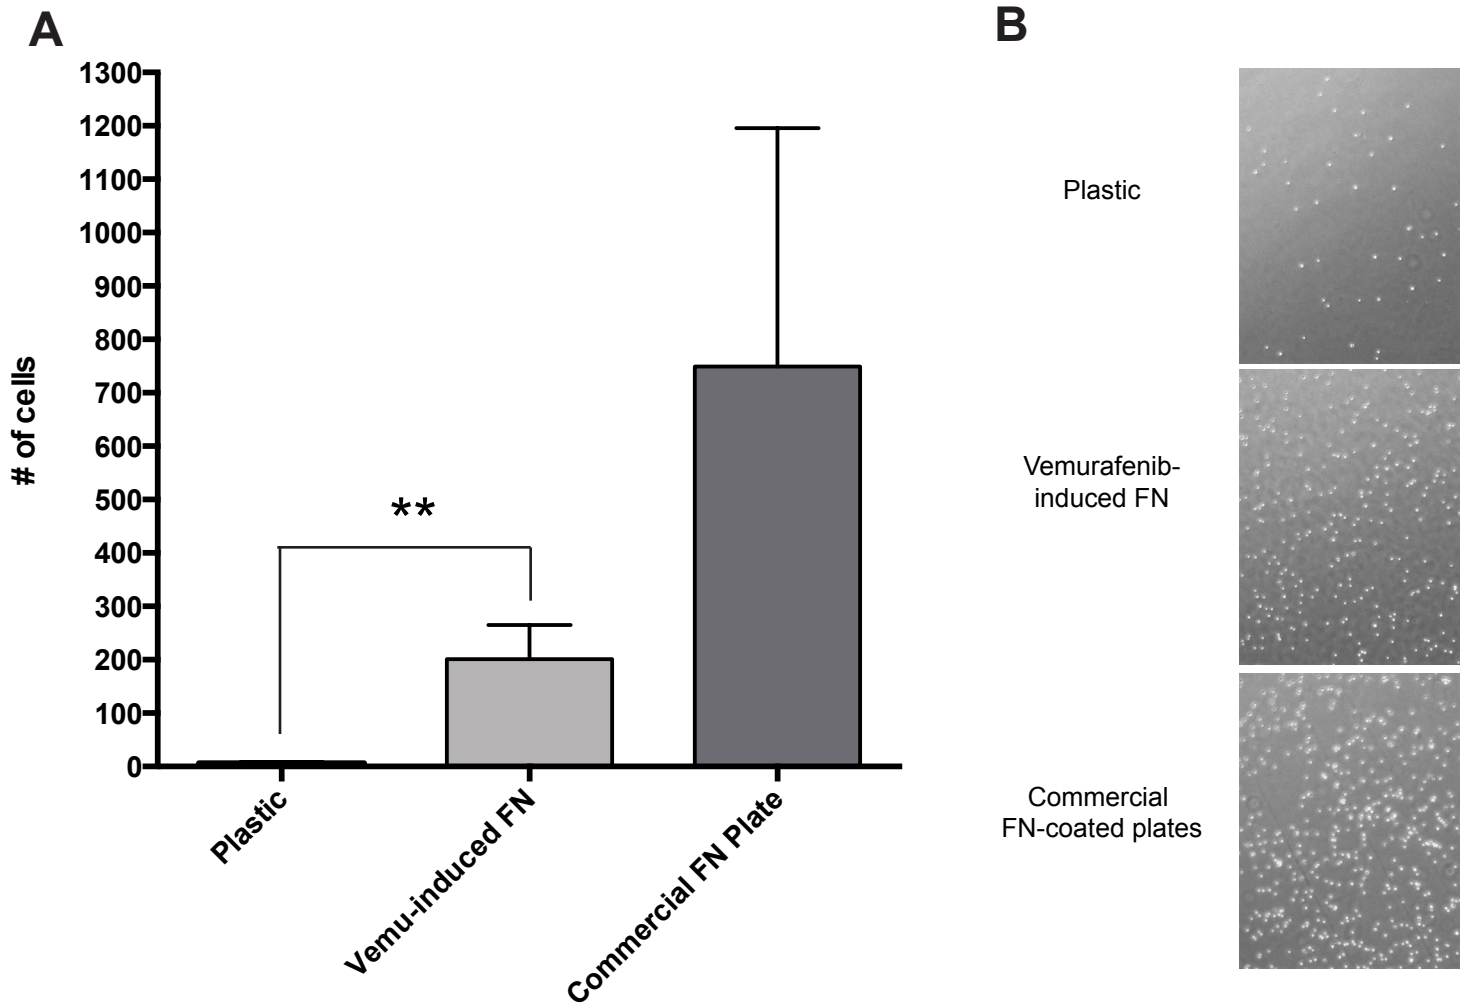

**Supplementary Figure 11. A:** Cell adhesion assay showing 1205Lu cell attachment to different surfaces, including plastic, vemurafenib-induced FN and commercially-available FN-coated plates after 15 minute incubation. **B:** Representative images of cell attachment in A.

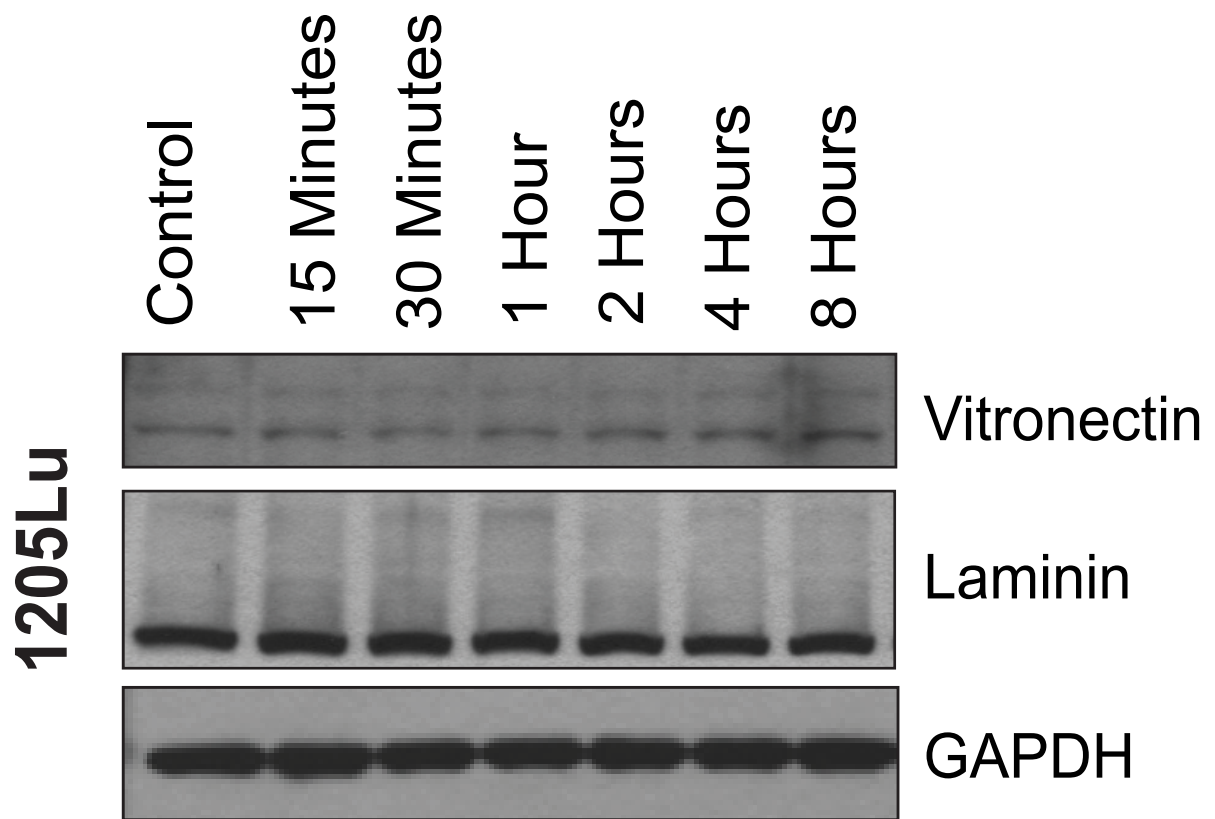

**Supplementary Figure 12.** Vemurafenib does not induce expression of vitronectin or laminin. 1205Lu cells were treated with drug for 0-8 hrs followed by Western blotting for vitronectin and laminin. GAPDH shows even protein loading.

WM164 PTEN siRNA + 3 $\mu$ M vemurafenib

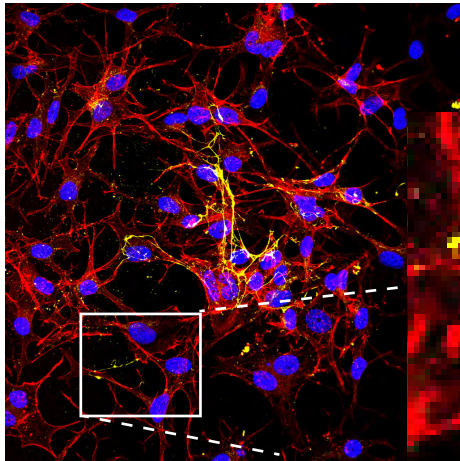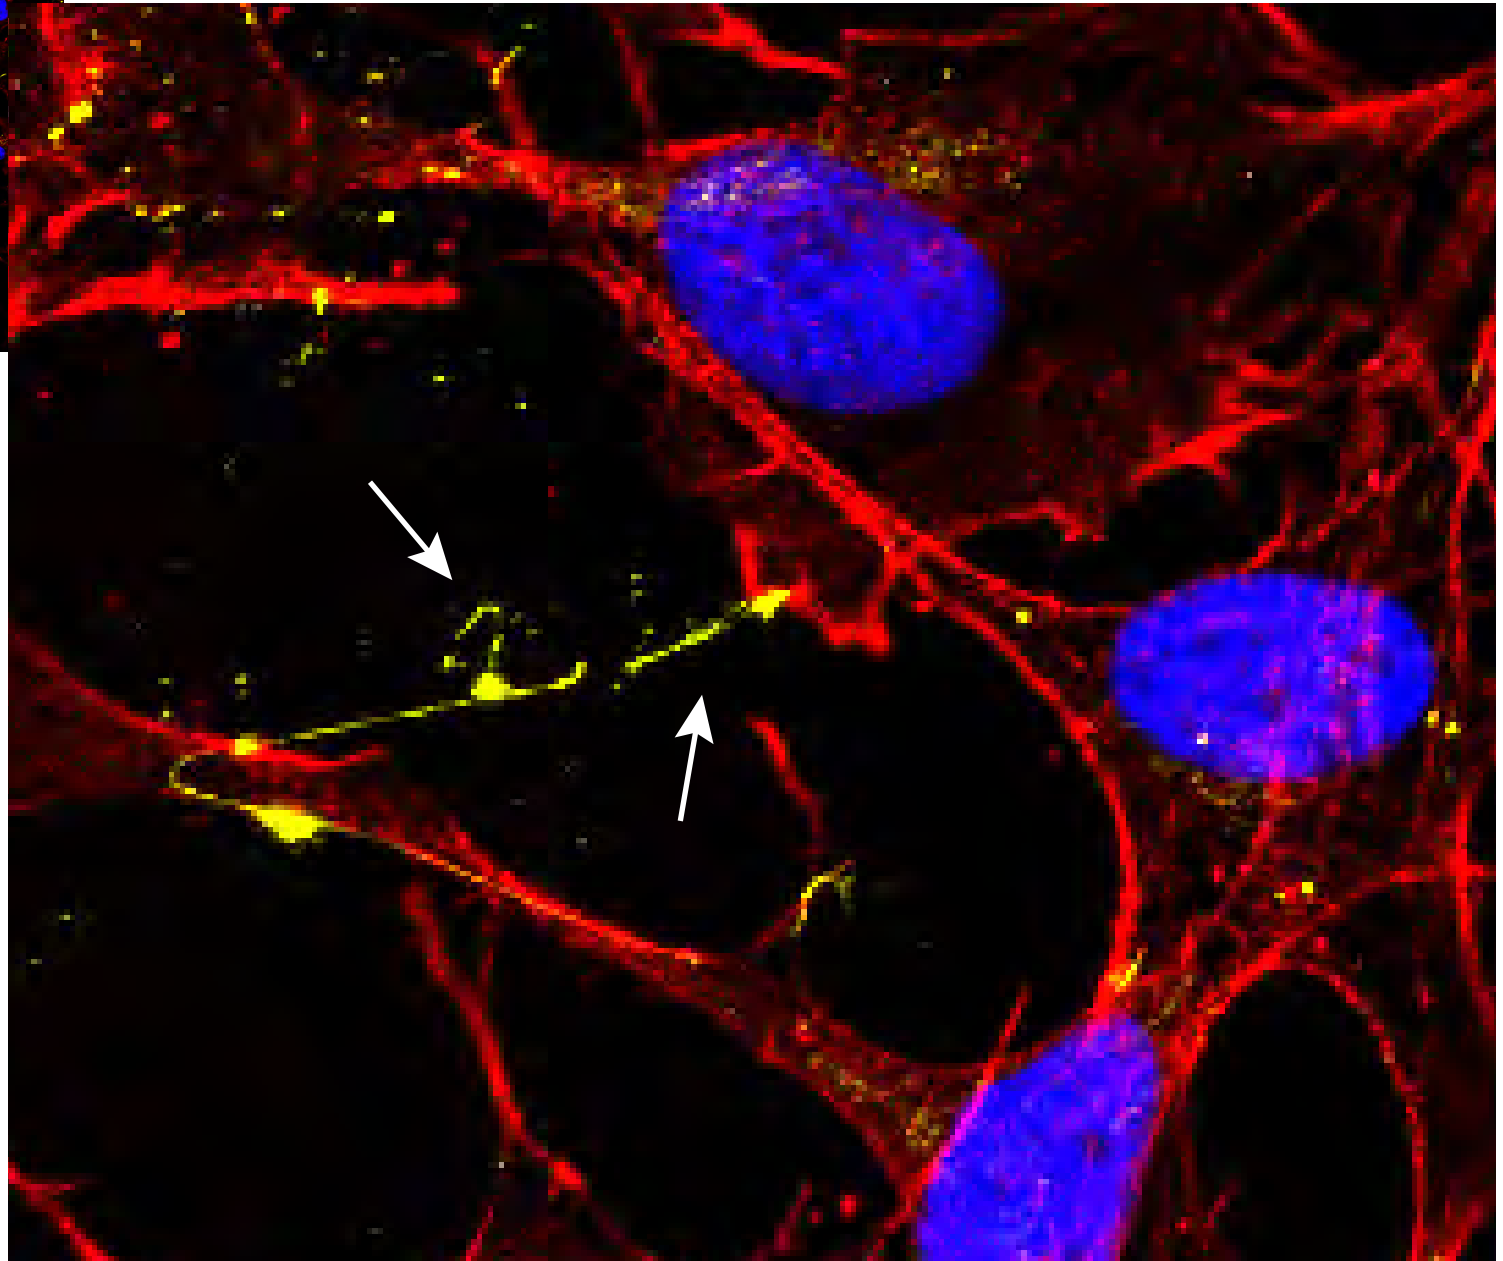

**Supplementary Figure 13.** Close-up image of immunofluorescent staining of FN (yellow), actin (Phalloidin, red), and the nucleus (DAPI, blue) showing extracellular FN deposition in WM164 following a siRNA-mediated knockdown of PTEN and 48-hour treatment with 3 $\mu$ M vemurafenib.

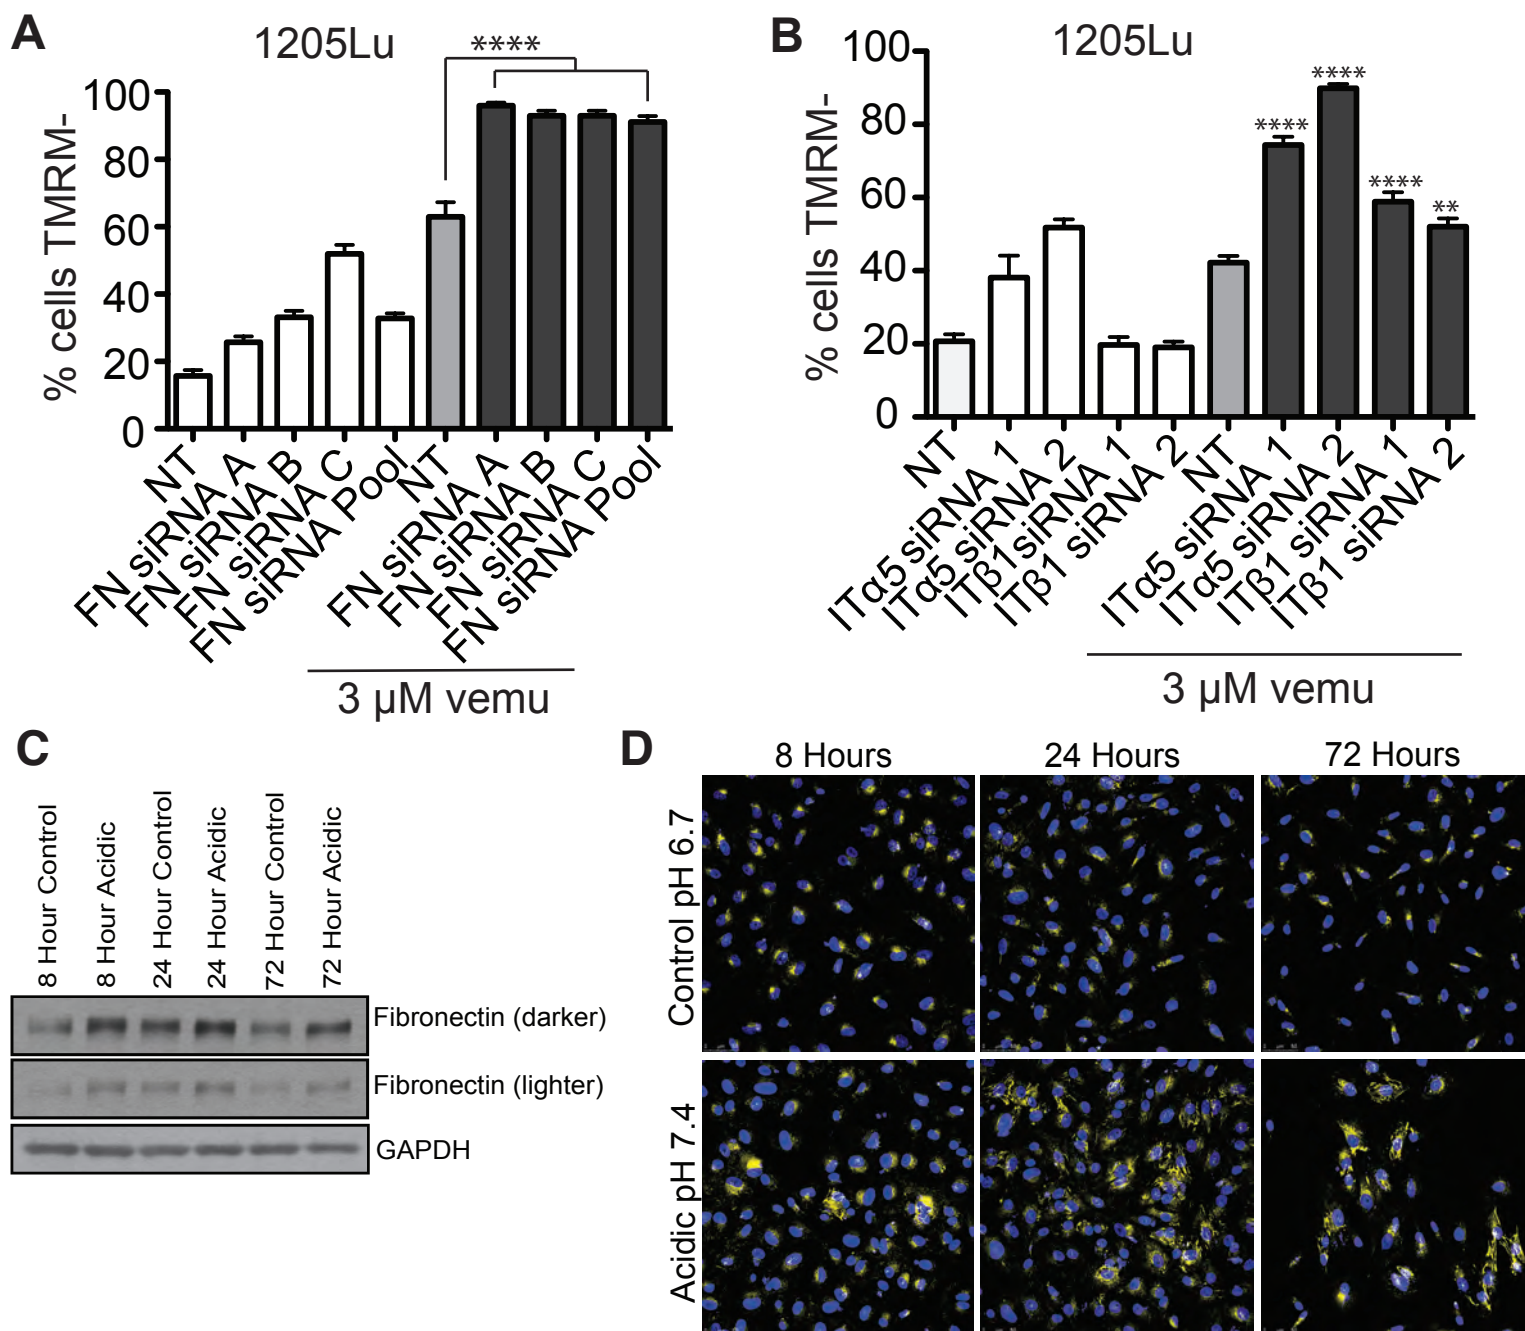

**Supplementary Figure 14.** Integrin/FN signaling is required for melanoma cell survival on therapy. **A:** siRNA knockdown of FN enhances vemurafenib mediated cell death. 1205Lu melanoma cells were transfected with three individual siRNAs and an siRNA pool targeting FN followed by treatment with vemurafenib (3  $\mu$ M, 72 hours). TMRM staining was measured by flow cytometry. **B:** Knockdown of  $\alpha$ 5 and  $\beta$ 1 integrin enhance vemurafenib-induced (3  $\mu$ M, 48 hrs.) apoptosis in 1205Lu cells. TMRM staining was measured by flow cytometry. **C:** Acid stress induced FN expression in BRAFV600E/PTEN- melanoma cell lines. 1205Lu melanoma cell line was grown in either normal (pH 7.4) or mildly acidic (pH6.7) media for 8-72 hours and Western blotting was used to show increased FN expression in cells cultured in mildly acidic media. **D:** Immunofluorescence showing increased FN expression (yellow) following treatment with acidic media as in (C).

**A**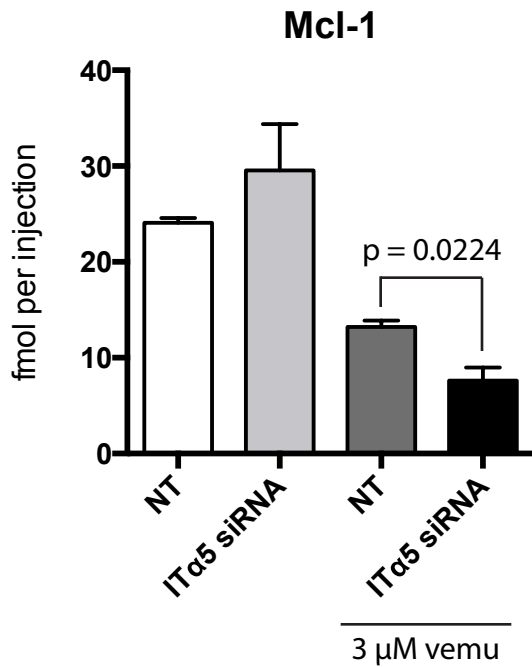**B**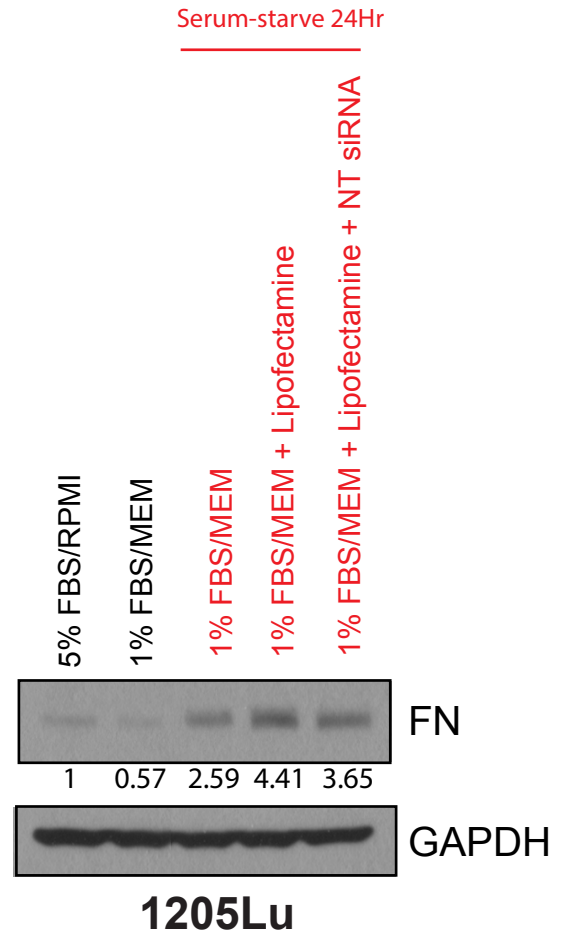

**Supplementary Figure 15. A:** Quantification of Mcl-1 levels with vemurafenib treatment and integrin knockdown using LC-MRM. **B:** Western Blot shows induction of FN in response to serum starvation and lipofectamine. The cells were plated and allowed to attach overnight. They were then transfected in serum-free MEM with lipofectamine (1:200 final dilution) for 24 hours, after which FBS was added to final concentration of 1% for an additional 48 hours.
